# Supplementary material for: Choosing mates based on the diet of your ancestors: replication of non-genetic assortative mating in Drosophila melanogaster
Source: PeerJ. 2015 Aug 6;3:e1173. doi: 10.7717/peerj.1173 (PMC4558060; doi:10.7717/peerj.1173)
Supplement: Supplemental Information 2 — These data were used to assess the significance of slight inconsistencies in experimental design. [file peerj-03-1173-s002.csv]

date	strain	male hold	population	time day	N	assort
03/14/13	All ral	10	2	am	57	34
03/21/13	All ral	10	1	am	18	9
03/21/13	All ral	10	1	pm	7	4
03/22/13	All ral	10	1	am	22	13
03/22/13	All ral	10	1	pm	20	5
09/05/13	All ral	10	1	am	77	36
09/12/13	All ral	10	2	am	22	10
09/19/13	All ral	10	1	am	79	46
03/14/13	Canton-S	10	2	am	1	1
03/21/13	Canton-S	10	1	am	3	2
03/21/13	Canton-S	10	1	pm	4	2
03/22/13	Canton-S	10	1	am	9	7
09/05/13	Canton-S	20	1	am	56	37
09/12/13	Canton-S	20	2	am	21	13
09/19/13	Canton-S	20	1	am	76	39
11/07/13	Canton-S	20	2	am	17	12
11/07/13	Canton-S	20	2	pm	31	19
11/14/13	Canton-S	20	1	am	45	23
11/14/13	Canton-S	20	1	pm	15	6
02/12/14	Canton-S	10	1	pm	66	38
