# Supplementary material for: Choosing mates based on the diet of your ancestors: replication of non-genetic assortative mating in Drosophila melanogaster
Source: PeerJ. 2015 Aug 6;3:e1173. doi: 10.7717/peerj.1173 (PMC4558060; doi:10.7717/peerj.1173)
Supplement: Supplemental Information 3 — The results of the logistic regression, which we used to assess the significance of slight inconsistencies in experimental design. [file peerj-03-1173-s003.xlsx]

## Sheet: Sheet1
Date	genotype	male holding	population	time of day	wing clip effect	N	# assortative	# disassortative
2013-03-14	All ral	10	2	am	No	57	34	23
2013-03-21	All ral	10	1	am	No	18	9	9
2013-03-21	All ral	10	1	pm	No	7	4	3
2013-03-22	All ral	10	1	am	No	22	13	9
2013-03-22	All ral	10	1	pm	No	20	5	15
2013-09-05	All ral	10	1	am	No	77	36	41
2013-09-12	All ral	10	2	am	No	22	10	12
2013-09-19	All ral	10	1	am	No	79	46	33
2013-03-14	Canton-S	10	2	am	No	1	1	0
2013-03-21	Canton-S	10	1	am	No	3	2	1
2013-03-21	Canton-S	10	1	pm	No	4	2	2
2013-03-22	Canton-S	10	1	am	No	9	7	2
2013-09-05	Canton-S	20	1	am	No	56	37	19
2013-09-12	Canton-S	20	2	am	No	21	13	8
2013-09-19	Canton-S	20	1	am	No	76	39	37
2013-11-07	Canton-S	20	2	am	Yes	17	12	5
2013-11-07	Canton-S	20	2	pm	Yes	31	19	12
2013-11-14	Canton-S	20	1	am	Yes	45	23	22
2013-11-14	Canton-S	20	1	pm	Yes	15	6	9
2014-02-12	Canton-S	10	1	pm	No	66	38	28
Analysis of logistic regressions: outputs from R
Deviance of residuals:
genotype	Min	1Q	Median	3Q	Max
All ral	-1.24842	-1.18649	0.01321	1.1684	1.25309
Canton-S	-1.5012	-1.0786	0.1197	1.0733	1.5184
Coefficients:
Genotype	Coefficient	Estimate	standard Error	z value	Pr(>|z|)
All ral	(Intercept)	0.31219	2.13145	0.146	0.884
All ral	value	-0.01068	0.04228	-0.252	0.801
All ral	time.daypm	-0.18945	1.4375	-0.132	0.895
All ral	population	-0.0507	1.24342	-0.041	0.967
Canton-S	(Intercept)	-0.13953	2.06074	-0.068	0.946
Canton-S	value	-0.05021	0.04545	-1.105	0.269
Canton-S	time.daypm	0.22343	1.01699	0.22	0.826
Canton-S	population	-0.48471	1.02589	-0.472	0.637
Canton-S	male.hold	0.10333	0.14724	0.702	0.483
Canton-S	wingclipeffectyes	-0.62955	1.34786	-0.467	0.64
	All ral	All ral DF	Canton-S	Canton-S DF
Null deviance	22.181	15	33.271	23
Residual deviance	22.17	12	31.951	18
AIC	30.117		43.951
Confidence interval of coefficients:
genotype	coefficient	0.025	0.975
All ral	(Intercept)	-3.99393	4.77794
All ral	value	-0.0979651	0.0735774
All ral	time.daypm	-3.14146	2.70969
All ral	population	-2.60321	2.47978
Canton-S	(Intercept)	-4.31827	4.01208
Canton-S	value	-0.150666	0.0344184
Canton-S	time.daypm	-1.78402	2.30075
Canton-S	population	-2.58673	1.52776
Canton-S	male.hold	-0.17784	0.420632
Canton-S	wingclipeffectyes	-3.47338	2.00806
