# Supplementary material for: Choosing mates based on the diet of your ancestors: replication of non-genetic assortative mating in Drosophila melanogaster
Source: PeerJ. 2015 Aug 6;3:e1173. doi: 10.7717/peerj.1173 (PMC4558060; doi:10.7717/peerj.1173)
Supplement: Supplemental Information 4 — Raw data from the 3-way experiment. [file peerj-03-1173-s004.xlsx]

## Sheet: Sheet1
Date	Genotype	Week 1 set or week 2 set? (generation time is 2 weeks, so sets were staggered to have flies out each week)	Wing clipping pattern was matched within treatment or mismatched	Plate # within a batch	Three-way mating pattern (FC = female CMY chooser, MS = male starch chooser, etc).	Assay start time	AM or PM?	Order	well possition	Copulation initiation time	Copulation end time	Male wing clip	Female wing clip	Mating pattern	Male diet treatment	Female diet treatment	Type of mating pattern	Binary assortative/disassortative	Loder	Loader	Data recorder	Copulation latency	Latency as integer	Copulation duration	Duration as integer
2014-04-17	Canton s	1	matched	1	FC	09:09:00	am	1	NA	09:16:00	09:30:00	R	R	assortative	cmy	cmy	cmy	1	NA	NA	NA	00:07:00	00:14:00	7	14
2014-04-17	Canton s	1	matched	1	FC	09:09:00	am	5	NA	09:20:00	09:37:00	R	R	assortative	cmy	cmy	cmy	1	NA	NA	NA	00:11:00	00:17:00	11	17
2014-04-17	Canton s	1	matched	1	FC	09:09:00	am	6	NA	09:21:00	09:40:00	R	R	assortative	cmy	cmy	cmy	1	NA	NA	NA	00:12:00	00:19:00	12	19
2014-04-17	Canton s	1	matched	1	FC	09:09:00	am	7	NA	09:21:00	09:40:00	R	R	assortative	cmy	cmy	cmy	1	NA	NA	NA	00:12:00	00:19:00	12	19
2014-04-17	Canton s	1	matched	1	FC	09:09:00	am	8	NA	09:21:00	09:40:00	R	R	assortative	cmy	cmy	cmy	1	NA	NA	NA	00:12:00	00:19:00	12	19
2014-04-17	Canton s	1	matched	1	FC	09:09:00	am	10	NA	09:23:00	09:46:00	R	R	assortative	cmy	cmy	cmy	1	NA	NA	NA	00:14:00	00:23:00	14	23
2014-04-17	Canton s	1	matched	1	FC	09:09:00	am	11	NA	09:24:00	09:49:00	R	R	assortative	cmy	cmy	cmy	1	NA	NA	NA	00:15:00	00:25:00	15	25
2014-04-17	Canton s	1	matched	1	FC	09:09:00	am	12	NA	09:26:00	09:50:00	R	R	assortative	cmy	cmy	cmy	1	NA	NA	NA	00:17:00	00:24:00	17	24
2014-04-17	Canton s	1	matched	1	FC	09:09:00	am	15	NA	09:32:00	09:52:00	R	R	assortative	cmy	cmy	cmy	1	NA	NA	NA	00:23:00	00:20:00	23	20
2014-04-17	Canton s	1	matched	1	FC	09:09:00	am	16	NA	09:34:00	09:58:00	R	R	assortative	cmy	cmy	cmy	1	NA	NA	NA	00:25:00	00:24:00	25	24
2014-04-17	Canton s	1	matched	1	FC	09:09:00	am	17	NA	09:37:00	10:00:00	R	R	assortative	cmy	cmy	cmy	1	NA	NA	NA	00:28:00	00:23:00	28	23
2014-04-17	Canton s	1	matched	1	FC	09:09:00	am	19	NA	09:48:00	10:12:00	R	R	assortative	cmy	cmy	cmy	1	NA	NA	NA	00:39:00	00:24:00	39	24
2014-04-17	Canton s	1	matched	1	FC	09:09:00	am	20	NA	09:49:00	10:13:00	R	R	assortative	cmy	cmy	cmy	1	NA	NA	NA	00:40:00	00:24:00	40	24
2014-04-17	Canton s	1	matched	1	FC	09:09:00	am	21	NA	09:49:00	10:10:00	R	R	assortative	cmy	cmy	cmy	1	NA	NA	NA	00:40:00	00:21:00	40	21
2014-04-17	Canton s	1	matched	1	FC	09:09:00	am	23	NA	10:07:00	10:31:00	R	R	assortative	cmy	cmy	cmy	1	NA	NA	NA	00:58:00	00:24:00	58	24
2014-04-17	Canton s	1	matched	2	FC	09:18:00	am	3	NA	09:30:00	09:47:00	R	R	assortative	cmy	cmy	cmy	1	NA	NA	NA	00:12:00	00:17:00	12	17
2014-04-17	Canton s	1	matched	2	FC	09:18:00	am	6	NA	09:33:00	09:58:00	R	R	assortative	cmy	cmy	cmy	1	NA	NA	NA	00:15:00	00:25:00	15	25
2014-04-17	Canton s	1	matched	2	FC	09:18:00	am	7	NA	09:33:00	09:52:00	R	R	assortative	cmy	cmy	cmy	1	NA	NA	NA	00:15:00	00:19:00	15	19
2014-04-17	Canton s	1	matched	2	FC	09:18:00	am	8	NA	09:37:00	09:53:00	R	R	assortative	cmy	cmy	cmy	1	NA	NA	NA	00:19:00	00:16:00	19	16
2014-04-17	Canton s	1	matched	2	FC	09:18:00	am	9	NA	09:38:00	09:57:00	R	R	assortative	cmy	cmy	cmy	1	NA	NA	NA	00:20:00	00:19:00	20	19
2014-04-17	Canton s	1	matched	2	FC	09:18:00	am	10	NA	09:38:00	09:58:00	R	R	assortative	cmy	cmy	cmy	1	NA	NA	NA	00:20:00	00:20:00	20	20
2014-04-17	Canton s	1	matched	2	FC	09:18:00	am	11	NA	09:39:00	10:02:00	R	R	assortative	cmy	cmy	cmy	1	NA	NA	NA	00:21:00	00:23:00	21	23
2014-04-17	Canton s	1	matched	2	FC	09:18:00	am	13	NA	09:43:00	10:04:00	R	R	assortative	cmy	cmy	cmy	1	NA	NA	NA	00:25:00	00:21:00	25	21
2014-04-17	Canton s	1	matched	2	FC	09:18:00	am	15	NA	09:47:00	10:06:00	R	R	assortative	cmy	cmy	cmy	1	NA	NA	NA	00:29:00	00:19:00	29	19
2014-04-17	Canton s	1	matched	2	FC	09:18:00	am	16	NA	10:04:00	10:23:00	R	R	assortative	cmy	cmy	cmy	1	NA	NA	NA	00:46:00	00:19:00	46	19
2014-04-17	Canton s	1	matched	2	FC	09:18:00	am	17	NA	10:05:00	10:23:00	R	R	assortative	cmy	cmy	cmy	1	NA	NA	NA	00:47:00	00:18:00	47	18
2014-04-17	Canton s	1	matched	2	FC	09:18:00	am	18	NA	10:13:00	10:33:00	R	R	assortative	cmy	cmy	cmy	1	NA	NA	NA	00:55:00	00:20:00	55	20
2014-04-17	Canton s	1	matched	1	FC	09:09:00	am	2	NA	09:17:00	09:39:00	L	R	disassortative	starch	cmy	CxS	0	NA	NA	NA	00:08:00	00:22:00	8	22
2014-04-17	Canton s	1	matched	1	FC	09:09:00	am	3	NA	09:18:00	09:39:00	L	R	disassortative	starch	cmy	CxS	0	NA	NA	NA	00:09:00	00:21:00	9	21
2014-04-17	Canton s	1	matched	1	FC	09:09:00	am	4	NA	09:20:00	09:37:00	L	R	disassortative	starch	cmy	CxS	0	NA	NA	NA	00:11:00	00:17:00	11	17
2014-04-17	Canton s	1	matched	1	FC	09:09:00	am	9	NA	09:22:00	09:41:00	L	R	disassortative	starch	cmy	CxS	0	NA	NA	NA	00:13:00	00:19:00	13	19
2014-04-17	Canton s	1	matched	1	FC	09:09:00	am	13	NA	09:30:00	09:50:00	L	R	disassortative	starch	cmy	CxS	0	NA	NA	NA	00:21:00	00:20:00	21	20
2014-04-17	Canton s	1	matched	1	FC	09:09:00	am	14	NA	09:32:00	09:53:00	L	R	disassortative	starch	cmy	CxS	0	NA	NA	NA	00:23:00	00:21:00	23	21
2014-04-17	Canton s	1	matched	1	FC	09:09:00	am	18	NA	09:37:00	10:00:00	L	R	disassortative	starch	cmy	CxS	0	NA	NA	NA	00:28:00	00:23:00	28	23
2014-04-17	Canton s	1	matched	1	FC	09:09:00	am	22	NA	10:03:00	10:26:00	L	R	disassortative	starch	cmy	CxS	0	NA	NA	NA	00:54:00	00:23:00	54	23
2014-04-17	Canton s	1	matched	2	FC	09:18:00	am	1	NA	09:28:00	09:47:00	L	R	disassortative	starch	cmy	CxS	0	NA	NA	NA	00:10:00	00:19:00	10	19
2014-04-17	Canton s	1	matched	2	FC	09:18:00	am	2	NA	09:29:00	09:42:00	L	R	disassortative	starch	cmy	CxS	0	NA	NA	NA	00:11:00	00:13:00	11	13
2014-04-17	Canton s	1	matched	2	FC	09:18:00	am	4	NA	09:31:00	09:53:00	L	R	disassortative	starch	cmy	CxS	0	NA	NA	NA	00:13:00	00:22:00	13	22
2014-04-17	Canton s	1	matched	2	FC	09:18:00	am	5	NA	09:33:00	09:53:00	L	R	disassortative	starch	cmy	CxS	0	NA	NA	NA	00:15:00	00:20:00	15	20
2014-04-17	Canton s	1	matched	2	FC	09:18:00	am	12	NA	09:40:00	10:06:00	L	R	disassortative	starch	cmy	CxS	0	NA	NA	NA	00:22:00	00:26:00	22	26
2014-04-17	Canton s	1	matched	2	FC	09:18:00	am	14	NA	09:46:00	10:04:00	L	R	disassortative	starch	cmy	CxS	0	NA	NA	NA	00:28:00	00:18:00	28	18
2014-04-24	Canton s	2	matched	5	FC	10:10:00	am	1	D5	10:13:00	10:34:00	L	L	assortative	cmy	cmy	cmy	1	NA	NA	NA	00:03:00	00:21:00	3	21
2014-04-24	Canton s	2	matched	5	FC	10:10:00	am	2	B2	10:17:00	10:32:00	L	L	assortative	cmy	cmy	cmy	1	NA	NA	NA	00:07:00	00:15:00	7	15
2014-04-24	Canton s	2	matched	5	FC	10:10:00	am	4	D1?	10:17:00	10:36:00	L	L	assortative	cmy	cmy	cmy	1	NA	NA	NA	00:07:00	00:19:00	7	19
2014-04-24	Canton s	2	matched	5	FC	10:10:00	am	8	D3	10:23:00	10:39:00	L	L	assortative	cmy	cmy	cmy	1	NA	NA	NA	00:13:00	00:16:00	13	16
2014-04-24	Canton s	2	matched	5	FC	10:10:00	am	15	B4	10:37:00	10:51:00	L	L	assortative	cmy	cmy	cmy	1	NA	NA	NA	00:27:00	00:14:00	27	14
2014-04-24	Canton s	2	matched	5	FC	10:10:00	am	16	C1	10:38:00	10:54:00	L	L	assortative	cmy	cmy	cmy	1	NA	NA	NA	00:28:00	00:16:00	28	16
2014-04-24	Canton s	2	matched	5	FC	10:10:00	am	18	D3 OR B1	10:41:00	11:02:00	L	L	assortative	cmy	cmy	cmy	1	NA	NA	NA	00:31:00	00:21:00	31	21
2014-04-24	Canton s	2	matched	5	FC	10:10:00	am	20	B5	10:53:00	11:09:00	L	L	assortative	cmy	cmy	cmy	1	NA	NA	NA	00:43:00	00:16:00	43	16
2014-04-24	Canton s	2	matched	6	FC	10:08:00	am	1	A5	10:08:00	10:21:00	L	L	assortative	cmy	cmy	cmy	1	NA	NA	NA	00:00:00	00:13:00	0	13
2014-04-24	Canton s	2	matched	6	FC	10:08:00	am	2	A2	10:08:00	10:21:00	L	L	assortative	cmy	cmy	cmy	1	NA	NA	NA	00:00:00	00:13:00	0	13
2014-04-24	Canton s	2	matched	6	FC	10:08:00	am	8	A4	10:46:00	11:08:00	L	L	assortative	cmy	cmy	cmy	1	NA	NA	NA	00:38:00	00:22:00	38	22
2014-04-24	Canton s	2	matched	6	FC	10:08:00	am	9	B6	10:49:00	11:07:00	L	L	assortative	cmy	cmy	cmy	1	NA	NA	NA	00:41:00	00:18:00	41	18
2014-04-24	Canton s	2	matched	6	FC	10:08:00	am	10	B3	11:00:00	11:18:00	L	L	assortative	cmy	cmy	cmy	1	NA	NA	NA	00:52:00	00:18:00	52	18
2014-04-24	Canton s	2	matched	5	FC	10:10:00	am	3	D2	10:17:00	10:36:00	R	L	disassortative	starch	cmy	CxS	0	NA	NA	NA	00:07:00	00:19:00	7	19
2014-04-24	Canton s	2	matched	5	FC	10:10:00	am	5	A3	10:17:00	10:39:00	R	L	disassortative	starch	cmy	CxS	0	NA	NA	NA	00:07:00	00:22:00	7	22
2014-04-24	Canton s	2	matched	5	FC	10:10:00	am	6	A5	10:20:00	10:37:00	R	L	disassortative	starch	cmy	CxS	0	NA	NA	NA	00:10:00	00:17:00	10	17
2014-04-24	Canton s	2	matched	5	FC	10:10:00	am	7	B6	10:21:00	10:39:00	R	L	disassortative	starch	cmy	CxS	0	NA	NA	NA	00:11:00	00:18:00	11	18
2014-04-24	Canton s	2	matched	5	FC	10:10:00	am	9	A2	10:25:00	10:43:00	R	L	disassortative	starch	cmy	CxS	0	NA	NA	NA	00:15:00	00:18:00	15	18
2014-04-24	Canton s	2	matched	5	FC	10:10:00	am	10	B3	10:26:00	10:38:00	R	L	disassortative	starch	cmy	CxS	0	NA	NA	NA	00:16:00	00:12:00	16	12
2014-04-24	Canton s	2	matched	5	FC	10:10:00	am	11	A4	10:26:00	10:42:00	R	L	disassortative	starch	cmy	CxS	0	NA	NA	NA	00:16:00	00:16:00	16	16
2014-04-24	Canton s	2	matched	5	FC	10:10:00	am	12	C4	10:27:00	10:39:00	R	L	disassortative	starch	cmy	CxS	0	NA	NA	NA	00:17:00	00:12:00	17	12
2014-04-24	Canton s	2	matched	5	FC	10:10:00	am	13	D3 OR B1	10:32:00	10:51:00	R	L	disassortative	starch	cmy	CxS	0	NA	NA	NA	00:22:00	00:19:00	22	19
2014-04-24	Canton s	2	matched	5	FC	10:10:00	am	14	A6	10:33:00	10:53:00	R	L	disassortative	starch	cmy	CxS	0	NA	NA	NA	00:23:00	00:20:00	23	20
2014-04-24	Canton s	2	matched	5	FC	10:10:00	am	17	C2	10:40:00	11:00:00	R	L	disassortative	starch	cmy	CxS	0	NA	NA	NA	00:30:00	00:20:00	30	20
2014-04-24	Canton s	2	matched	5	FC	10:10:00	am	19	A1	10:44:00	11:02:00	R	L	disassortative	starch	cmy	CxS	0	NA	NA	NA	00:34:00	00:18:00	34	18
2014-04-24	Canton s	2	matched	6	FC	10:08:00	am	3	A3	10:17:00	10:30:00	R	L	disassortative	starch	cmy	CxS	0	NA	NA	NA	00:09:00	00:13:00	9	13
2014-04-24	Canton s	2	matched	6	FC	10:08:00	am	4	A6	10:20:00	10:39:00	R	L	disassortative	starch	cmy	CxS	0	NA	NA	NA	00:12:00	00:19:00	12	19
2014-04-24	Canton s	2	matched	6	FC	10:08:00	am	5	B1	10:25:00	10:50:00	R	L	disassortative	starch	cmy	CxS	0	NA	NA	NA	00:17:00	00:25:00	17	25
2014-04-24	Canton s	2	matched	6	FC	10:08:00	am	6	B2	10:28:00	10:42:00	R	L	disassortative	starch	cmy	CxS	0	NA	NA	NA	00:20:00	00:14:00	20	14
2014-04-24	Canton s	2	matched	6	FC	10:08:00	am	7	A1	10:36:00	10:55:00	R	L	disassortative	starch	cmy	CxS	0	NA	NA	NA	00:28:00	00:19:00	28	19
2014-05-01	Canton s	1	matched	1	FC	09:28:00	am	1		09:37:00	09:50:00	R	R	assortative	cmy	cmy	cmy	1	NA	NA	NA	00:09:00	00:13:00	9	13
2014-05-01	Canton s	1	matched	1	FC	09:28:00	am	2		09:38:00	09:50:00	R	R	assortative	cmy	cmy	cmy	1	NA	NA	NA	00:10:00	00:12:00	10	12
2014-05-01	Canton s	1	matched	1	FC	09:28:00	am	4		09:41:00	10:05:00	R	R	assortative	cmy	cmy	cmy	1	NA	NA	NA	00:13:00	00:24:00	13	24
2014-05-01	Canton s	1	matched	1	FC	09:28:00	am	5		09:42:00	10:06:00	R	R	assortative	cmy	cmy	cmy	1	NA	NA	NA	00:14:00	00:24:00	14	24
2014-05-01	Canton s	1	matched	1	FC	09:28:00	am	9		09:52:00	10:11:00	R	R	assortative	cmy	cmy	cmy	1	NA	NA	NA	00:24:00	00:19:00	24	19
2014-05-01	Canton s	1	matched	1	FC	09:28:00	am	11		10:02:00	10:22:00	R	R	assortative	cmy	cmy	cmy	1	NA	NA	NA	00:34:00	00:20:00	34	20
2014-05-01	Canton s	1	matched	1	FC	09:28:00	am	13		10:10:00	10:26:00	R	R	assortative	cmy	cmy	cmy	1	NA	NA	NA	00:42:00	00:16:00	42	16
2014-05-01	Canton s	1	matched	2	FC	09:36:00	am	3		09:43:00	10:04:00	R	R	assortative	cmy	cmy	cmy	1	NA	NA	NA	00:07:00	00:21:00	7	21
2014-05-01	Canton s	1	matched	2	FC	09:36:00	am	6		09:45:00	10:03:00	R	R	assortative	cmy	cmy	cmy	1	NA	NA	NA	00:09:00	00:18:00	9	18
2014-05-01	Canton s	1	matched	2	FC	09:36:00	am	9		09:48:00	10:05:00	R	R	assortative	cmy	cmy	cmy	1	NA	NA	NA	00:12:00	00:17:00	12	17
2014-05-01	Canton s	1	matched	2	FC	09:36:00	am	11		09:54:00	10:10:00	R	R	assortative	cmy	cmy	cmy	1	NA	NA	NA	00:18:00	00:16:00	18	16
2014-05-01	Canton s	1	matched	2	FC	09:36:00	am	14		09:57:00	10:17:00	R	R	assortative	cmy	cmy	cmy	1	NA	NA	NA	00:21:00	00:20:00	21	20
2014-05-01	Canton s	1	matched	2	FC	09:36:00	am	15		10:00:00	10:21:00	R	R	assortative	cmy	cmy	cmy	1	NA	NA	NA	00:24:00	00:21:00	24	21
2014-05-01	Canton s	1	matched	2	FC	09:36:00	am	17		10:30:00	10:51:00	R	R	assortative	cmy	cmy	cmy	1	NA	NA	NA	00:54:00	00:21:00	54	21
2014-05-01	Canton s	1	matched	1	FC	09:28:00	am	3		09:38:00	09:56:00	L	R	disassortative	starch	cmy	CxS	0	NA	NA	NA	00:10:00	00:18:00	10	18
2014-05-01	Canton s	1	matched	1	FC	09:28:00	am	6		09:46:00	10:11:00	L	R	disassortative	starch	cmy	CxS	0	NA	NA	NA	00:18:00	00:25:00	18	25
2014-05-01	Canton s	1	matched	1	FC	09:28:00	am	7		09:49:00	10:10:00	L	R	disassortative	starch	cmy	CxS	0	NA	NA	NA	00:21:00	00:21:00	21	21
2014-05-01	Canton s	1	matched	1	FC	09:28:00	am	8		09:50:00	10:13:00	L	R	disassortative	starch	cmy	CxS	0	NA	NA	NA	00:22:00	00:23:00	22	23
2014-05-01	Canton s	1	matched	1	FC	09:28:00	am	10		09:53:00	10:15:00	L	R	disassortative	starch	cmy	CxS	0	NA	NA	NA	00:25:00	00:22:00	25	22
2014-05-01	Canton s	1	matched	1	FC	09:28:00	am	12		10:02:00	10:22:00	L	R	disassortative	starch	cmy	CxS	0	NA	NA	NA	00:34:00	00:20:00	34	20
2014-05-01	Canton s	1	matched	1	FC	09:28:00	am	14		10:27:00	10:47:00	L	R	disassortative	starch	cmy	CxS	0	NA	NA	NA	00:59:00	00:20:00	59	20
2014-05-01	Canton s	1	matched	2	FC	09:36:00	am	1		09:40:00	10:01:00	L	R	disassortative	starch	cmy	CxS	0	NA	NA	NA	00:04:00	00:21:00	4	21
2014-05-01	Canton s	1	matched	2	FC	09:36:00	am	2		09:40:00	10:00:00	L	R	disassortative	starch	cmy	CxS	0	NA	NA	NA	00:04:00	00:20:00	4	20
2014-05-01	Canton s	1	matched	2	FC	09:36:00	am	4		09:43:00	10:01:00	L	R	disassortative	starch	cmy	CxS	0	NA	NA	NA	00:07:00	00:18:00	7	18
2014-05-01	Canton s	1	matched	2	FC	09:36:00	am	5		09:44:00	10:01:00	L	R	disassortative	starch	cmy	CxS	0	NA	NA	NA	00:08:00	00:17:00	8	17
2014-05-01	Canton s	1	matched	2	FC	09:36:00	am	7		09:46:00	10:03:00	L	R	disassortative	starch	cmy	CxS	0	NA	NA	NA	00:10:00	00:17:00	10	17
2014-05-01	Canton s	1	matched	2	FC	09:36:00	am	8		09:47:00	10:05:00	L	R	disassortative	starch	cmy	CxS	0	NA	NA	NA	00:11:00	00:18:00	11	18
2014-05-01	Canton s	1	matched	2	FC	09:36:00	am	10		09:51:00	10:06:00	L	R	disassortative	starch	cmy	CxS	0	NA	NA	NA	00:15:00	00:15:00	15	15
2014-05-01	Canton s	1	matched	2	FC	09:36:00	am	12		09:55:00	10:19:00	L	R	disassortative	starch	cmy	CxS	0	NA	NA	NA	00:19:00	00:24:00	19	24
2014-05-01	Canton s	1	matched	2	FC	09:36:00	am	13		09:56:00	10:20:00	L	R	disassortative	starch	cmy	CxS	0	NA	NA	NA	00:20:00	00:24:00	20	24
2014-05-01	Canton s	1	matched	2	FC	09:36:00	am	16		10:01:00	10:26:00	L	R	disassortative	starch	cmy	CxS	0	NA	NA	NA	00:25:00	00:25:00	25	25
2014-05-07	Canton s	2	matched	1	FC	09:13:00	am	1		09:29:00	09:49:00	L	L	assortative	cmy	cmy	cmy	1	NA	NA	NA	00:16:00	00:20:00	16	20
2014-05-07	Canton s	2	matched	1	FC	09:13:00	am	2		09:30:00	09:47:00	L	L	assortative	cmy	cmy	cmy	1	NA	NA	NA	00:17:00	00:17:00	17	17
2014-05-07	Canton s	2	matched	1	FC	09:13:00	am	4		09:31:00	09:48:00	L	L	assortative	cmy	cmy	cmy	1	NA	NA	NA	00:18:00	00:17:00	18	17
2014-05-07	Canton s	2	matched	1	FC	09:13:00	am	5		09:33:00	09:58:00	L	L	assortative	cmy	cmy	cmy	1	NA	NA	NA	00:20:00	00:25:00	20	25
2014-05-07	Canton s	2	matched	1	FC	09:13:00	am	6		09:39:00	10:01:00	L	L	assortative	cmy	cmy	cmy	1	NA	NA	NA	00:26:00	00:22:00	26	22
2014-05-07	Canton s	2	matched	1	FC	09:13:00	am	7		09:40:00	10:00:00	L	L	assortative	cmy	cmy	cmy	1	NA	NA	NA	00:27:00	00:20:00	27	20
2014-05-07	Canton s	2	matched	1	FC	09:13:00	am	9		09:46:00	10:02:00	L	L	assortative	cmy	cmy	cmy	1	NA	NA	NA	00:33:00	00:16:00	33	16
2014-05-07	Canton s	2	matched	1	FC	09:13:00	am	10		09:46:00	10:05:00	L	L	assortative	cmy	cmy	cmy	1	NA	NA	NA	00:33:00	00:19:00	33	19
2014-05-07	Canton s	2	matched	1	FC	09:13:00	am	11		09:47:00	10:03:00	L	L	assortative	cmy	cmy	cmy	1	NA	NA	NA	00:34:00	00:16:00	34	16
2014-05-07	Canton s	2	matched	1	FC	09:13:00	am	12		10:00:00	10:17:00	L	L	assortative	cmy	cmy	cmy	1	NA	NA	NA	00:47:00	00:17:00	47	17
2014-05-07	Canton s	2	matched	1	FC	09:13:00	am	14		10:10:00	10:30:00	L	L	assortative	cmy	cmy	cmy	1	NA	NA	NA	00:57:00	00:20:00	57	20
2014-05-07	Canton s	2	matched	2	FC	09:20:00	am	2		09:32:00	09:56:00	L	L	assortative	cmy	cmy	cmy	1	NA	NA	NA	00:12:00	00:24:00	12	24
2014-05-07	Canton s	2	matched	2	FC	09:20:00	am	3		09:36:00	09:54:00	L	L	assortative	cmy	cmy	cmy	1	NA	NA	NA	00:16:00	00:18:00	16	18
2014-05-07	Canton s	2	matched	2	FC	09:20:00	am	4		09:36:00	09:56:00	L	L	assortative	cmy	cmy	cmy	1	NA	NA	NA	00:16:00	00:20:00	16	20
2014-05-07	Canton s	2	matched	2	FC	09:20:00	am	5		09:36:00	09:56:00	L	L	assortative	cmy	cmy	cmy	1	NA	NA	NA	00:16:00	00:20:00	16	20
2014-05-07	Canton s	2	matched	2	FC	09:20:00	am	6		09:36:00	09:59:00	L	L	assortative	cmy	cmy	cmy	1	NA	NA	NA	00:16:00	00:23:00	16	23
2014-05-07	Canton s	2	matched	2	FC	09:20:00	am	11		09:45:00	10:05:00	L	L	assortative	cmy	cmy	cmy	1	NA	NA	NA	00:25:00	00:20:00	25	20
2014-05-07	Canton s	2	matched	2	FC	09:20:00	am	13		09:52:00	10:11:00	L	L	assortative	cmy	cmy	cmy	1	NA	NA	NA	00:32:00	00:19:00	32	19
2014-05-07	Canton s	2	matched	2	FC	09:20:00	am	14		09:53:00	10:11:00	L	L	assortative	cmy	cmy	cmy	1	NA	NA	NA	00:33:00	00:18:00	33	18
2014-05-07	Canton s	2	matched	2	FC	09:20:00	am	17		10:09:00	10:28:00	L	L	assortative	cmy	cmy	cmy	1	NA	NA	NA	00:49:00	00:19:00	49	19
2014-05-07	Canton s	2	matched	1	FC	09:13:00	am	3		09:31:00	09:47:00	R	L	disassortative	starch	cmy	CxS	0	NA	NA	NA	00:18:00	00:16:00	18	16
2014-05-07	Canton s	2	matched	1	FC	09:13:00	am	8		09:44:00	10:02:00	R	L	disassortative	starch	cmy	CxS	0	NA	NA	NA	00:31:00	00:18:00	31	18
2014-05-07	Canton s	2	matched	1	FC	09:13:00	am	13		10:01:00	10:24:00	R	L	disassortative	starch	cmy	CxS	0	NA	NA	NA	00:48:00	00:23:00	48	23
2014-05-07	Canton s	2	matched	2	FC	09:20:00	am	1		09:30:00	09:45:00	R	L	disassortative	starch	cmy	CxS	0	NA	NA	NA	00:10:00	00:15:00	10	15
2014-05-07	Canton s	2	matched	2	FC	09:20:00	am	7		09:36:00	09:59:00	R	L	disassortative	starch	cmy	CxS	0	NA	NA	NA	00:16:00	00:23:00	16	23
2014-05-07	Canton s	2	matched	2	FC	09:20:00	am	8		09:42:00	10:00:00	R	L	disassortative	starch	cmy	CxS	0	NA	NA	NA	00:22:00	00:18:00	22	18
2014-05-07	Canton s	2	matched	2	FC	09:20:00	am	9		09:43:00	10:03:00	R	L	disassortative	starch	cmy	CxS	0	NA	NA	NA	00:23:00	00:20:00	23	20
2014-05-07	Canton s	2	matched	2	FC	09:20:00	am	10		09:45:00	09:59:00	R	L	disassortative	starch	cmy	CxS	0	NA	NA	NA	00:25:00	00:14:00	25	14
2014-05-07	Canton s	2	matched	2	FC	09:20:00	am	12		09:49:00	10:09:00	R	L	disassortative	starch	cmy	CxS	0	NA	NA	NA	00:29:00	00:20:00	29	20
2014-05-07	Canton s	2	matched	2	FC	09:20:00	am	15		09:54:00	10:14:00	R	L	disassortative	starch	cmy	CxS	0	NA	NA	NA	00:34:00	00:20:00	34	20
2014-05-07	Canton s	2	matched	2	FC	09:20:00	am	16		10:07:00	10:26:00	R	L	disassortative	starch	cmy	CxS	0	NA	NA	NA	00:47:00	00:19:00	47	19
2014-05-15	Canton s	2	matched	1	FC	09:06:00	am	3		09:24:00	09:46:00	R	R	assortative	cmy	cmy	cmy	1	NA	NA	NA	00:18:00	00:22:00	18	22
2014-05-15	Canton s	2	matched	1	FC	09:06:00	am	5		09:30:00	09:51:00	R	R	assortative	cmy	cmy	cmy	1	NA	NA	NA	00:24:00	00:21:00	24	21
2014-05-15	Canton s	2	matched	1	FC	09:06:00	am	6		09:38:00	09:59:00	R	R	assortative	cmy	cmy	cmy	1	NA	NA	NA	00:32:00	00:21:00	32	21
2014-05-15	Canton s	2	matched	1	FC	09:06:00	am	7		09:46:00	10:01:00	R	R	assortative	cmy	cmy	cmy	1	NA	NA	NA	00:40:00	00:15:00	40	15
2014-05-15	Canton s	2	matched	2	FC	09:06:00	am	3		09:14:00	09:32:00	R	R	assortative	cmy	cmy	cmy	1	NA	NA	NA	00:08:00	00:18:00	8	18
2014-05-15	Canton s	2	matched	2	FC	09:06:00	am	4		09:18:00	09:32:00	R	R	assortative	cmy	cmy	cmy	1	NA	NA	NA	00:12:00	00:14:00	12	14
2014-05-15	Canton s	2	matched	2	FC	09:06:00	am	7		09:20:00	09:38:00	R	R	assortative	cmy	cmy	cmy	1	NA	NA	NA	00:14:00	00:18:00	14	18
2014-05-15	Canton s	2	matched	2	FC	09:06:00	am	8		09:22:00	09:38:00	R	R	assortative	cmy	cmy	cmy	1	NA	NA	NA	00:16:00	00:16:00	16	16
2014-05-15	Canton s	2	matched	2	FC	09:06:00	am	9		09:32:00	09:49:00	R	R	assortative	cmy	cmy	cmy	1	NA	NA	NA	00:26:00	00:17:00	26	17
2014-05-15	Canton s	2	matched	2	FC	09:06:00	am	11		09:43:00	10:04:00	R	R	assortative	cmy	cmy	cmy	1	NA	NA	NA	00:37:00	00:21:00	37	21
2014-05-15	Canton s	2	matched	2	FC	09:06:00	am	14		10:01:00	10:14:00	R	R	assortative	cmy	cmy	cmy	1	NA	NA	NA	00:55:00	00:13:00	55	13
2014-05-15	Canton s	2	matched	1	FC	09:06:00	am	1		09:18:00	09:41:00	L	R	disassortative	starch	cmy	CxS	0	NA	NA	NA	00:12:00	00:23:00	12	23
2014-05-15	Canton s	2	matched	1	FC	09:06:00	am	2		09:21:00	09:41:00	L	R	disassortative	starch	cmy	CxS	0	NA	NA	NA	00:15:00	00:20:00	15	20
2014-05-15	Canton s	2	matched	1	FC	09:06:00	am	4		09:27:00	09:45:00	L	R	disassortative	starch	cmy	CxS	0	NA	NA	NA	00:21:00	00:18:00	21	18
2014-05-15	Canton s	2	matched	1	FC	09:06:00	am	8		09:59:00	10:13:00	L	R	disassortative	starch	cmy	CxS	0	NA	NA	NA	00:53:00	00:14:00	53	14
2014-05-15	Canton s	2	matched	2	FC	09:06:00	am	1		09:14:00	09:31:00	L	R	disassortative	starch	cmy	CxS	0	NA	NA	NA	00:08:00	00:17:00	8	17
2014-05-15	Canton s	2	matched	2	FC	09:06:00	am	2		09:14:00	09:33:00	L	R	disassortative	starch	cmy	CxS	0	NA	NA	NA	00:08:00	00:19:00	8	19
2014-05-15	Canton s	2	matched	2	FC	09:06:00	am	5		09:19:00	09:36:00	L	R	disassortative	starch	cmy	CxS	0	NA	NA	NA	00:13:00	00:17:00	13	17
2014-05-15	Canton s	2	matched	2	FC	09:06:00	am	6		09:20:00	09:41:00	L	R	disassortative	starch	cmy	CxS	0	NA	NA	NA	00:14:00	00:21:00	14	21
2014-05-15	Canton s	2	matched	2	FC	09:06:00	am	10		09:35:00	09:56:00	L	R	disassortative	starch	cmy	CxS	0	NA	NA	NA	00:29:00	00:21:00	29	21
2014-05-15	Canton s	2	matched	2	FC	09:06:00	am	12		09:51:00	10:10:00	L	R	disassortative	starch	cmy	CxS	0	NA	NA	NA	00:45:00	00:19:00	45	19
2014-05-15	Canton s	2	matched	2	FC	09:06:00	am	13		09:54:00	10:16:00	L	R	disassortative	starch	cmy	CxS	0	NA	NA	NA	00:48:00	00:22:00	48	22
2014-05-22	Canton s	1	matched	1	FC	09:31:00	am	1		09:45:00	10:03:00	L	L	assortative	cmy	cmy	cmy	1	NA	NA	NA	00:14:00	00:18:00	14	18
2014-05-22	Canton s	1	matched	1	FC	09:31:00	am	3		09:48:00	10:05:00	L	L	assortative	cmy	cmy	cmy	1	NA	NA	NA	00:17:00	00:17:00	17	17
2014-05-22	Canton s	1	matched	1	FC	09:31:00	am	5		10:05:00	10:29:00	L	L	assortative	cmy	cmy	cmy	1	NA	NA	NA	00:34:00	00:24:00	34	24
2014-05-22	Canton s	1	matched	1	FC	09:31:00	am	6		10:11:00	10:36:00	L	L	assortative	cmy	cmy	cmy	1	NA	NA	NA	00:40:00	00:25:00	40	25
2014-05-22	Canton s	1	matched	1	FC	09:31:00	am	9		10:18:00	10:41:00	L	L	assortative	cmy	cmy	cmy	1	NA	NA	NA	00:47:00	00:23:00	47	23
2014-05-22	Canton s	1	matched	1	FC	09:31:00	am	10		10:21:00	10:46:00	L	L	assortative	cmy	cmy	cmy	1	NA	NA	NA	00:50:00	00:25:00	50	25
2014-05-22	Canton s	1	matched	1	FC	09:31:00	am	11		10:24:00	10:43:00	L	L	assortative	cmy	cmy	cmy	1	NA	NA	NA	00:53:00	00:19:00	53	19
2014-05-22	Canton s	1	matched	1	FC	09:31:00	am	12		10:24:00	10:42:00	L	L	assortative	cmy	cmy	cmy	1	NA	NA	NA	00:53:00	00:18:00	53	18
2014-05-22	Canton s	1	matched	1	FC	09:31:00	am	2		09:47:00	10:03:00	R	L	disassortative	starch	cmy	CxS	0	NA	NA	NA	00:16:00	00:16:00	16	16
2014-05-22	Canton s	1	matched	1	FC	09:31:00	am	4		09:51:00	10:13:00	R	L	disassortative	starch	cmy	CxS	0	NA	NA	NA	00:20:00	00:22:00	20	22
2014-05-22	Canton s	1	matched	1	FC	09:31:00	am	7		10:11:00	10:30:00	R	L	disassortative	starch	cmy	CxS	0	NA	NA	NA	00:40:00	00:19:00	40	19
2014-05-22	Canton s	1	matched	1	FC	09:31:00	am	8		10:16:00	10:33:00	R	L	disassortative	starch	cmy	CxS	0	NA	NA	NA	00:45:00	00:17:00	45	17
2014-05-28	Canton s	2	matched	1	FC	09:35:00	am	1		09:35:00	09:51:00	R	R	assortative	cmy	cmy	cmy	1	NA	NA	NA	00:00:00	00:16:00	0	16
2014-05-28	Canton s	2	matched	1	FC	09:35:00	am	3		?	10:05:00	R	R	assortative	cmy	cmy	cmy	1	NA	NA	NA	#VALUE!	#VALUE!	#VALUE!	#VALUE!
2014-05-28	Canton s	2	matched	1	FC	09:35:00	am	7		09:48:00	10:10:00	R	R	assortative	cmy	cmy	cmy	1	NA	NA	NA	00:13:00	00:22:00	13	22
2014-05-28	Canton s	2	matched	1	FC	09:35:00	am	9		09:48:00	10:08:00	R	R	assortative	cmy	cmy	cmy	1	NA	NA	NA	00:13:00	00:20:00	13	20
2014-05-28	Canton s	2	matched	1	FC	09:35:00	am	12		09:50:00	10:09:00	R	R	assortative	cmy	cmy	cmy	1	NA	NA	NA	00:15:00	00:19:00	15	19
2014-05-28	Canton s	2	matched	1	FC	09:35:00	am	13		09:50:00	10:12:00	R	R	assortative	cmy	cmy	cmy	1	NA	NA	NA	00:15:00	00:22:00	15	22
2014-05-28	Canton s	2	matched	1	FC	09:35:00	am	14		09:52:00	10:09:00	R	R	assortative	cmy	cmy	cmy	1	NA	NA	NA	00:17:00	00:17:00	17	17
2014-05-28	Canton s	2	matched	1	FC	09:35:00	am	16		09:52:00	10:11:00	R	R	assortative	cmy	cmy	cmy	1	NA	NA	NA	00:17:00	00:19:00	17	19
2014-05-28	Canton s	2	matched	1	FC	09:35:00	am	21		10:09:00	10:26:00	R	R	assortative	cmy	cmy	cmy	1	NA	NA	NA	00:34:00	00:17:00	34	17
2014-05-28	Canton s	2	matched	1	FC	09:35:00	am	22		10:23:00	10:42:00	R	R	assortative	cmy	cmy	cmy	1	NA	NA	NA	00:48:00	00:19:00	48	19
2014-05-28	Canton s	2	matched	1	FC	09:35:00	am	2		09:40:00	10:04:00	L	R	disassortative	starch	cmy	CxS	0	NA	NA	NA	00:05:00	00:24:00	5	24
2014-05-28	Canton s	2	matched	1	FC	09:35:00	am	4		09:45:00	10:08:00	L	R	disassortative	starch	cmy	CxS	0	NA	NA	NA	00:10:00	00:23:00	10	23
2014-05-28	Canton s	2	matched	1	FC	09:35:00	am	5		09:46:00	10:04:00	L	R	disassortative	starch	cmy	CxS	0	NA	NA	NA	00:11:00	00:18:00	11	18
2014-05-28	Canton s	2	matched	1	FC	09:35:00	am	6		09:46:00	10:05:00	L	R	disassortative	starch	cmy	CxS	0	NA	NA	NA	00:11:00	00:19:00	11	19
2014-05-28	Canton s	2	matched	1	FC	09:35:00	am	8		09:48:00	10:12:00	L	R	disassortative	starch	cmy	CxS	0	NA	NA	NA	00:13:00	00:24:00	13	24
2014-05-28	Canton s	2	matched	1	FC	09:35:00	am	10		09:48:00	10:09:00	L	R	disassortative	starch	cmy	CxS	0	NA	NA	NA	00:13:00	00:21:00	13	21
2014-05-28	Canton s	2	matched	1	FC	09:35:00	am	11		09:48:00	10:09:00	L	R	disassortative	starch	cmy	CxS	0	NA	NA	NA	00:13:00	00:21:00	13	21
2014-05-28	Canton s	2	matched	1	FC	09:35:00	am	15		09:52:00	10:14:00	L	R	disassortative	starch	cmy	CxS	0	NA	NA	NA	00:17:00	00:22:00	17	22
2014-05-28	Canton s	2	matched	1	FC	09:35:00	am	17		09:54:00	10:14:00	L	R	disassortative	starch	cmy	CxS	0	NA	NA	NA	00:19:00	00:20:00	19	20
2014-05-28	Canton s	2	matched	1	FC	09:35:00	am	18		09:55:00	10:16:00	L	R	disassortative	starch	cmy	CxS	0	NA	NA	NA	00:20:00	00:21:00	20	21
2014-05-28	Canton s	2	matched	1	FC	09:35:00	am	19		09:59:00	10:14:00	L	R	disassortative	starch	cmy	CxS	0	NA	NA	NA	00:24:00	00:15:00	24	15
2014-05-28	Canton s	2	matched	1	FC	09:35:00	am	20		10:07:00	10:32:00	L	R	disassortative	starch	cmy	CxS	0	NA	NA	NA	00:32:00	00:25:00	32	25
2014-06-05	Canton s	1	matched	1	FC	09:25:00	am	2		09:35:00	09:51:00	L	L	assortative	cmy	cmy	cmy	1	NA	NA	NA	00:10:00	00:16:00	10	16
2014-06-05	Canton s	1	matched	1	FC	09:25:00	am	3		09:37:00	09:51:00	L	L	assortative	cmy	cmy	cmy	1	NA	NA	NA	00:12:00	00:14:00	12	14
2014-06-05	Canton s	1	matched	1	FC	09:25:00	am	4		09:41:00	10:02:00	L	L	assortative	cmy	cmy	cmy	1	NA	NA	NA	00:16:00	00:21:00	16	21
2014-06-05	Canton s	1	matched	1	FC	09:25:00	am	5		09:43:00	09:58:00	L	L	assortative	cmy	cmy	cmy	1	NA	NA	NA	00:18:00	00:15:00	18	15
2014-06-05	Canton s	1	matched	1	FC	09:25:00	am	6		09:46:00	09:54:00	L	L	assortative	cmy	cmy	cmy	1	NA	NA	NA	00:21:00	00:08:00	21	8
2014-06-05	Canton s	1	matched	1	FC	09:25:00	am	7		09:50:00	10:11:00	L	L	assortative	cmy	cmy	cmy	1	NA	NA	NA	00:25:00	00:21:00	25	21
2014-06-05	Canton s	1	matched	1	FC	09:25:00	am	8		09:50:00	10:10:00	L	L	assortative	cmy	cmy	cmy	1	NA	NA	NA	00:25:00	00:20:00	25	20
2014-06-05	Canton s	1	matched	1	FC	09:25:00	am	9		09:56:00	10:16:00	L	L	assortative	cmy	cmy	cmy	1	NA	NA	NA	00:31:00	00:20:00	31	20
2014-06-05	Canton s	1	matched	1	FC	09:25:00	am	10		09:56:00	10:12:00	L	L	assortative	cmy	cmy	cmy	1	NA	NA	NA	00:31:00	00:16:00	31	16
2014-06-05	Canton s	1	matched	1	FC	09:25:00	am	12		10:06:00	10:31:00	L	L	assortative	cmy	cmy	cmy	1	NA	NA	NA	00:41:00	00:25:00	41	25
2014-06-05	Canton s	1	matched	1	FC	09:25:00	am	1		09:34:00	09:53:00	R	L	disassortative	starch	cmy	CxS	0	NA	NA	NA	00:09:00	00:19:00	9	19
2014-06-05	Canton s	1	matched	1	FC	09:25:00	am	11		10:03:00	10:24:00	R	L	disassortative	starch	cmy	CxS	0	NA	NA	NA	00:38:00	00:21:00	38	21
2014-04-17	Canton s	1	matched	7	FS	10:14:00	am	2	NA	10:22:00	10:45:00	L	L	assortative	starch	starch	starch	1	Michael	Michael	Michael	00:08:00	00:23:00	8	23
2014-04-17	Canton s	1	matched	7	FS	10:14:00	am	3	NA	10:22:00	10:50:00	L	L	assortative	starch	starch	starch	1	Michael	Michael	Michael	00:08:00	00:28:00	8	28
2014-04-17	Canton s	1	matched	7	FS	10:14:00	am	4	NA	NA	NA	L	L	assortative	starch	starch	starch	1	Michael	Michael	Michael	#VALUE!	#VALUE!	#VALUE!	#VALUE!
2014-04-17	Canton s	1	matched	7	FS	10:14:00	am	7	NA	10:25:00	10:41:00	L	L	assortative	starch	starch	starch	1	Michael	Michael	Michael	00:11:00	00:16:00	11	16
2014-04-17	Canton s	1	matched	7	FS	10:14:00	am	18	NA	10:44:00	11:08:00	L	L	assortative	starch	starch	starch	1	Michael	Michael	Michael	00:30:00	00:24:00	30	24
2014-04-17	Canton s	1	matched	7	FS	10:14:00	am	19	NA	10:52:00	11:17:00	L	L	assortative	starch	starch	starch	1	Michael	Michael	Michael	00:38:00	00:25:00	38	25
2014-04-17	Canton s	1	matched	8	FS	10:19:00	am	2	NA	10:25:00	10:48:00	L	L	assortative	starch	starch	starch	1	Michael	Michael	Michael	00:06:00	00:23:00	6	23
2014-04-17	Canton s	1	matched	8	FS	10:19:00	am	3	NA	10:25:00	10:48:00	L	L	assortative	starch	starch	starch	1	Michael	Michael	Michael	00:06:00	00:23:00	6	23
2014-04-17	Canton s	1	matched	8	FS	10:19:00	am	5	NA	10:29:00	10:55:00	L	L	assortative	starch	starch	starch	1	Michael	Michael	Michael	00:10:00	00:26:00	10	26
2014-04-17	Canton s	1	matched	8	FS	10:19:00	am	6	NA	10:29:00	10:46:00	L	L	assortative	starch	starch	starch	1	Michael	Michael	Michael	00:10:00	00:17:00	10	17
2014-04-17	Canton s	1	matched	8	FS	10:19:00	am	7	NA	10:29:00	10:48:00	L	L	assortative	starch	starch	starch	1	Michael	Michael	Michael	00:10:00	00:19:00	10	19
2014-04-17	Canton s	1	matched	8	FS	10:19:00	am	9	NA	10:29:00	10:48:00	L	L	assortative	starch	starch	starch	1	Michael	Michael	Michael	00:10:00	00:19:00	10	19
2014-04-17	Canton s	1	matched	8	FS	10:19:00	am	10	NA	10:31:00	10:51:00	L	L	assortative	starch	starch	starch	1	Michael	Michael	Michael	00:12:00	00:20:00	12	20
2014-04-17	Canton s	1	matched	8	FS	10:19:00	am	12	NA	10:35:00	10:55:00	L	L	assortative	starch	starch	starch	1	Michael	Michael	Michael	00:16:00	00:20:00	16	20
2014-04-17	Canton s	1	matched	8	FS	10:19:00	am	13	NA	10:35:00	10:57:00	L	L	assortative	starch	starch	starch	1	Michael	Michael	Michael	00:16:00	00:22:00	16	22
2014-04-17	Canton s	1	matched	8	FS	10:19:00	am	14	NA	10:36:00	10:49:00	L	L	assortative	starch	starch	starch	1	Michael	Michael	Michael	00:17:00	00:13:00	17	13
2014-04-17	Canton s	1	matched	8	FS	10:19:00	am	15	NA	10:33:00	10:54:00	L	L	assortative	starch	starch	starch	1	Michael	Michael	Michael	00:14:00	00:21:00	14	21
2014-04-17	Canton s	1	matched	8	FS	10:19:00	am	17	NA	10:37:00	11:04:00	L	L	assortative	starch	starch	starch	1	Michael	Michael	Michael	00:18:00	00:27:00	18	27
2014-04-17	Canton s	1	matched	8	FS	10:19:00	am	18	NA	10:39:00	11:05:00	L	L	assortative	starch	starch	starch	1	Michael	Michael	Michael	00:20:00	00:26:00	20	26
2014-04-17	Canton s	1	matched	8	FS	10:19:00	am	19	NA	10:39:00	11:02:00	L	L	assortative	starch	starch	starch	1	Michael	Michael	Michael	00:20:00	00:23:00	20	23
2014-04-17	Canton s	1	matched	8	FS	10:19:00	am	21	NA	10:45:00	11:07:00	L	L	assortative	starch	starch	starch	1	Michael	Michael	Michael	00:26:00	00:22:00	26	22
2014-04-17	Canton s	1	matched	7	FS	10:14:00	am	17	NA	10:38:00	10:59:00	L	L	assortative	starch	starch	starch	1	Michael	Michael	Michael	00:24:00	00:21:00	24	21
2014-04-17	Canton s	1	matched	7	FS	10:14:00	am	1	NA	10:21:00	10:39:00	R	L	disassortative	cmy	starch	SxC	0	Michael	Michael	Michael	00:07:00	00:18:00	7	18
2014-04-17	Canton s	1	matched	7	FS	10:14:00	am	5	NA	NA	NA	R	L	disassortative	cmy	starch	SxC	0	Michael	Michael	Michael	#VALUE!	#VALUE!	#VALUE!	#VALUE!
2014-04-17	Canton s	1	matched	7	FS	10:14:00	am	6	NA	NA	NA	R	L	disassortative	cmy	starch	SxC	0	Michael	Michael	Michael	#VALUE!	#VALUE!	#VALUE!	#VALUE!
2014-04-17	Canton s	1	matched	7	FS	10:14:00	am	8	NA	10:26:00	10:50:00	R	L	disassortative	cmy	starch	SxC	0	Michael	Michael	Michael	00:12:00	00:24:00	12	24
2014-04-17	Canton s	1	matched	7	FS	10:14:00	am	9	NA	10:26:00	10:47:00	R	L	disassortative	cmy	starch	SxC	0	Michael	Michael	Michael	00:12:00	00:21:00	12	21
2014-04-17	Canton s	1	matched	7	FS	10:14:00	am	10	NA	NA	10:51:00	R	L	disassortative	cmy	starch	SxC	0	Michael	Michael	Michael	#VALUE!	#VALUE!	#VALUE!	#VALUE!
2014-04-17	Canton s	1	matched	7	FS	10:14:00	am	11	NA	10:31:00	10:56:00	R	L	disassortative	cmy	starch	SxC	0	Michael	Michael	Michael	00:17:00	00:25:00	17	25
2014-04-17	Canton s	1	matched	7	FS	10:14:00	am	12	NA	10:31:00	10:49:00	R	L	disassortative	cmy	starch	SxC	0	Michael	Michael	Michael	00:17:00	00:18:00	17	18
2014-04-17	Canton s	1	matched	7	FS	10:14:00	am	13	NA	10:34:00	10:51:00	R	L	disassortative	cmy	starch	SxC	0	Michael	Michael	Michael	00:20:00	00:17:00	20	17
2014-04-17	Canton s	1	matched	7	FS	10:14:00	am	14	NA	10:34:00	10:56:00	R	L	disassortative	cmy	starch	SxC	0	Michael	Michael	Michael	00:20:00	00:22:00	20	22
2014-04-17	Canton s	1	matched	7	FS	10:14:00	am	15	NA	10:36:00	10:53:00	R	L	disassortative	cmy	starch	SxC	0	Michael	Michael	Michael	00:22:00	00:17:00	22	17
2014-04-17	Canton s	1	matched	7	FS	10:14:00	am	16	NA	10:37:00	10:59:00	R	L	disassortative	cmy	starch	SxC	0	Michael	Michael	Michael	00:23:00	00:22:00	23	22
2014-04-17	Canton s	1	matched	7	FS	10:14:00	am	20	NA	10:55:00	14:07:00	R	L	disassortative	cmy	starch	SxC	0	Michael	Michael	Michael	00:41:00	03:12:00	41	12
2014-04-17	Canton s	1	matched	7	FS	10:14:00	am	21	NA	11:13:00	11:35:00	R	L	disassortative	cmy	starch	SxC	0	Michael	Michael	Michael	00:59:00	00:22:00	59	22
2014-04-17	Canton s	1	matched	8	FS	10:19:00	am	1	NA	10:25:00	10:45:00	R	L	disassortative	cmy	starch	SxC	0	Michael	Michael	Michael	00:06:00	00:20:00	6	20
2014-04-17	Canton s	1	matched	8	FS	10:19:00	am	4	NA	10:25:00	10:45:00	R	L	disassortative	cmy	starch	SxC	0	Michael	Michael	Michael	00:06:00	00:20:00	6	20
2014-04-17	Canton s	1	matched	8	FS	10:19:00	am	8	NA	10:29:00	10:53:00	R	L	disassortative	cmy	starch	SxC	0	Michael	Michael	Michael	00:10:00	00:24:00	10	24
2014-04-17	Canton s	1	matched	8	FS	10:19:00	am	11	NA	10:32:00	10:58:00	R	L	disassortative	cmy	starch	SxC	0	Michael	Michael	Michael	00:13:00	00:26:00	13	26
2014-04-17	Canton s	1	matched	8	FS	10:19:00	am	16	NA	10:37:00	10:58:00	R	L	disassortative	cmy	starch	SxC	0	Michael	Michael	Michael	00:18:00	00:21:00	18	21
2014-04-17	Canton s	1	matched	8	FS	10:19:00	am	20	NA	10:43:00	11:04:00	R	L	disassortative	cmy	starch	SxC	0	Michael	Michael	Michael	00:24:00	00:21:00	24	21
2014-04-17	Canton s	1	matched	8	FS	10:19:00	am	22	NA	10:48:00	11:03:00	R	L	disassortative	cmy	starch	SxC	0	Michael	Michael	Michael	00:29:00	00:15:00	29	15
2014-04-17	Canton s	1	matched	8	FS	10:19:00	am	23	NA	10:57:00	11:20:00	R	L	disassortative	cmy	starch	SxC	0	Michael	Michael	Michael	00:38:00	00:23:00	38	23
2014-04-24	Canton s	2	matched	3	FS	09:43:00	am	1	C1	09:53:00	10:11:00	R	R	assortative	starch	starch	starch	1	NA	NA	NA	00:10:00	00:18:00	10	18
2014-04-24	Canton s	2	matched	3	FS	09:43:00	am	2	C2	09:55:00	10:09:00	R	R	assortative	starch	starch	starch	1	NA	NA	NA	00:12:00	00:14:00	12	14
2014-04-24	Canton s	2	matched	3	FS	09:43:00	am	3	B5	09:56:00	10:09:00	R	R	assortative	starch	starch	starch	1	NA	NA	NA	00:13:00	00:13:00	13	13
2014-04-24	Canton s	2	matched	3	FS	09:43:00	am	5	A4 OR A5	09:59:00	10:19:00	R	R	assortative	starch	starch	starch	1	NA	NA	NA	00:16:00	00:20:00	16	20
2014-04-24	Canton s	2	matched	3	FS	09:43:00	am	7	C5	10:03:00	10:19:00	R	R	assortative	starch	starch	starch	1	NA	NA	NA	00:20:00	00:16:00	20	16
2014-04-24	Canton s	2	matched	3	FS	09:43:00	am	11	B3	10:15:00	10:33:00	R	R	assortative	starch	starch	starch	1	NA	NA	NA	00:32:00	00:18:00	32	18
2014-04-24	Canton s	2	matched	3	FS	09:43:00	am	15	A4 OR A5	10:21:00	10:37:00	R	R	assortative	starch	starch	starch	1	NA	NA	NA	00:38:00	00:16:00	38	16
2014-04-24	Canton s	2	matched	3	FS	09:43:00	am	18	B4	10:39:00	11:00:00	R	R	assortative	starch	starch	starch	1	NA	NA	NA	00:56:00	00:21:00	56	21
2014-04-24	Canton s	2	matched	8	FS	09:48:00	am	4	A5	10:17:00	10:32:00	R	R	assortative	starch	starch	starch	1	NA	NA	Michael	00:29:00	00:15:00	29	15
2014-04-24	Canton s	2	matched	3	FS	09:43:00	am	4	D1	09:56:00	10:17:00	L	R	disassortative	cmy	starch	SxC	0	NA	NA	NA	00:13:00	00:21:00	13	21
2014-04-24	Canton s	2	matched	3	FS	09:43:00	am	6	A1	10:01:00	10:23:00	L	R	disassortative	cmy	starch	SxC	0	NA	NA	NA	00:18:00	00:22:00	18	22
2014-04-24	Canton s	2	matched	3	FS	09:43:00	am	8	C4	10:05:00	10:25:00	L	R	disassortative	cmy	starch	SxC	0	NA	NA	NA	00:22:00	00:20:00	22	20
2014-04-24	Canton s	2	matched	3	FS	09:43:00	am	9	A6	10:08:00	10:31:00	L	R	disassortative	cmy	starch	SxC	0	NA	NA	NA	00:25:00	00:23:00	25	23
2014-04-24	Canton s	2	matched	3	FS	09:43:00	am	10	D2	10:11:00	10:31:00	L	R	disassortative	cmy	starch	SxC	0	NA	NA	NA	00:28:00	00:20:00	28	20
2014-04-24	Canton s	2	matched	3	FS	09:43:00	am	12	B2	10:17:00	10:34:00	L	R	disassortative	cmy	starch	SxC	0	NA	NA	NA	00:34:00	00:17:00	34	17
2014-04-24	Canton s	2	matched	3	FS	09:43:00	am	13	D4	10:20:00	10:40:00	L	R	disassortative	cmy	starch	SxC	0	NA	NA	NA	00:37:00	00:20:00	37	20
2014-04-24	Canton s	2	matched	3	FS	09:43:00	am	14	C6	10:20:00	10:39:00	L	R	disassortative	cmy	starch	SxC	0	NA	NA	NA	00:37:00	00:19:00	37	19
2014-04-24	Canton s	2	matched	3	FS	09:43:00	am	16	D3	10:22:00	10:37:00	L	R	disassortative	cmy	starch	SxC	0	NA	NA	NA	00:39:00	00:15:00	39	15
2014-04-24	Canton s	2	matched	3	FS	09:43:00	am	17	A3	10:33:00	10:54:00	L	R	disassortative	cmy	starch	SxC	0	NA	NA	NA	00:50:00	00:21:00	50	21
2014-04-24	Canton s	2	matched	8	FS	09:48:00	am	1	A6	10:04:00	10:22:00	L	R	disassortative	cmy	starch	SxC	0	NA	NA	Michael	00:16:00	00:18:00	16	18
2014-04-24	Canton s	2	matched	8	FS	09:48:00	am	2	A4	10:04:00	10:32:00	L	R	disassortative	cmy	starch	SxC	0	NA	NA	Michael	00:16:00	00:28:00	16	28
2014-04-24	Canton s	2	matched	8	FS	09:48:00	am	3	B3	10:14:00	10:32:00	L	R	disassortative	cmy	starch	SxC	0	NA	NA	Michael	00:26:00	00:18:00	26	18
2014-04-24	Canton s	2	matched	8	FS	09:48:00	am	5	A3	10:22:00	10:43:00	L	R	disassortative	cmy	starch	SxC	0	NA	NA	Michael	00:34:00	00:21:00	34	21
2014-04-24	Canton s	1	matched	8	FS	09:48:00	am	7	B2	10:30:00	10:48:00	L	R	disassortative	cmy	starch	SxC	0	NA	NA	Michael	00:42:00	00:18:00	42	18
2014-04-24	Canton s	1	matched	8	FS	09:48:00	am	8	A2	10:43:00	10:46:00	L	R	disassortative	cmy	starch	SxC	0	NA	NA	Michael	00:55:00	00:03:00	55	3
2014-04-24	Canton s	2	matched	8	FS	09:48:00	am	6	B1	10:30:00	10:43:00	NA	R	NA	NA	starch	NA	NA	NA	NA	Michael	00:42:00	00:13:00	42	13
2014-05-01	Canton s	1	matched	7	FS	09:37:00	am	13		10:07:00	10:25:00	L	L	assortative	starch	starch	starch	1	NA	NA	NA	00:30:00	00:18:00	30	18
2014-05-01	Canton s	1	matched	8	FS	09:43:00	am	1		09:47:00	10:06:00	L	L	assortative	starch	starch	starch	1	NA	NA	NA	00:04:00	00:19:00	4	19
2014-05-01	Canton s	1	matched	8	FS	09:43:00	am	2		09:48:00	10:08:00	L	L	assortative	starch	starch	starch	1	NA	NA	NA	00:05:00	00:20:00	5	20
2014-05-01	Canton s	1	matched	8	FS	09:43:00	am	5		09:50:00	10:04:00	L	L	assortative	starch	starch	starch	1	NA	NA	NA	00:07:00	00:14:00	7	14
2014-05-01	Canton s	1	matched	8	FS	09:43:00	am	8		09:53:00	10:15:00	L	L	assortative	starch	starch	starch	1	NA	NA	NA	00:10:00	00:22:00	10	22
2014-05-01	Canton s	1	matched	8	FS	09:43:00	am	9		09:54:00	10:09:00	L	L	assortative	starch	starch	starch	1	NA	NA	NA	00:11:00	00:15:00	11	15
2014-05-01	Canton s	2	matched	8	FS	09:43:00	am	14		10:10:00	10:24:00	L	L	assortative	starch	starch	starch	1	NA	NA	NA	00:27:00	00:14:00	27	14
2014-05-01	Canton s	1	matched	7	FS	09:37:00	am	3		09:48:00	10:09:00	R	L	disassortative	cmy	starch	SxC	0	NA	NA	NA	00:11:00	00:21:00	11	21
2014-05-01	Canton s	1	matched	7	FS	09:37:00	am	4		09:55:00	10:11:00	R	L	disassortative	cmy	starch	SxC	0	NA	NA	NA	00:18:00	00:16:00	18	16
2014-05-01	Canton s	1	matched	7	FS	09:37:00	am	5		09:57:00	10:09:00	R	L	disassortative	cmy	starch	SxC	0	NA	NA	NA	00:20:00	00:12:00	20	12
2014-05-01	Canton s	1	matched	7	FS	09:37:00	am	6		09:58:00	10:21:00	R	L	disassortative	cmy	starch	SxC	0	NA	NA	NA	00:21:00	00:23:00	21	23
2014-05-01	Canton s	1	matched	7	FS	09:37:00	am	7		09:59:00	10:10:00	R	L	disassortative	cmy	starch	SxC	0	NA	NA	NA	00:22:00	00:11:00	22	11
2014-05-01	Canton s	1	matched	7	FS	09:37:00	am	8		09:59:00	10:12:00	R	L	disassortative	cmy	starch	SxC	0	NA	NA	NA	00:22:00	00:13:00	22	13
2014-05-01	Canton s	1	matched	7	FS	09:37:00	am	9		09:59:00	10:21:00	R	L	disassortative	cmy	starch	SxC	0	NA	NA	NA	00:22:00	00:22:00	22	22
2014-05-01	Canton s	1	matched	7	FS	09:37:00	am	10		09:59:00	10:13:00	R	L	disassortative	cmy	starch	SxC	0	NA	NA	NA	00:22:00	00:14:00	22	14
2014-05-01	Canton s	1	matched	7	FS	09:37:00	am	11		10:02:00	10:12:00	R	L	disassortative	cmy	starch	SxC	0	NA	NA	NA	00:25:00	00:10:00	25	10
2014-05-01	Canton s	1	matched	7	FS	09:37:00	am	12		10:02:00	10:22:00	R	L	disassortative	cmy	starch	SxC	0	NA	NA	NA	00:25:00	00:20:00	25	20
2014-05-01	Canton s	1	matched	7	FS	09:37:00	am	14		10:07:00	10:23:00	R	L	disassortative	cmy	starch	SxC	0	NA	NA	NA	00:30:00	00:16:00	30	16
2014-05-01	Canton s	1	matched	7	FS	09:37:00	am	15		10:09:00	10:26:00	R	L	disassortative	cmy	starch	SxC	0	NA	NA	NA	00:32:00	00:17:00	32	17
2014-05-01	Canton s	1	matched	7	FS	09:37:00	am	16		10:09:00	10:23:00	R	L	disassortative	cmy	starch	SxC	0	NA	NA	NA	00:32:00	00:14:00	32	14
2014-05-01	Canton s	1	matched	7	FS	09:37:00	am	17		10:12:00	10:42:00	R	L	disassortative	cmy	starch	SxC	0	NA	NA	NA	00:35:00	00:30:00	35	30
2014-05-01	Canton s	1	matched	7	FS	09:37:00	am	18		10:12:00	10:25:00	R	L	disassortative	cmy	starch	SxC	0	NA	NA	NA	00:35:00	00:13:00	35	13
2014-05-01	Canton s	1	matched	7	FS	09:37:00	am	19		10:31:00	10:45:00	R	L	disassortative	cmy	starch	SxC	0	NA	NA	NA	00:54:00	00:14:00	54	14
2014-05-01	Canton s	1	matched	8	FS	09:43:00	am	3		09:49:00	10:06:00	R	L	disassortative	cmy	starch	SxC	0	NA	NA	NA	00:06:00	00:17:00	6	17
2014-05-01	Canton s	1	matched	8	FS	09:43:00	am	4		09:49:00	10:09:00	R	L	disassortative	cmy	starch	SxC	0	NA	NA	NA	00:06:00	00:20:00	6	20
2014-05-01	Canton s	1	matched	8	FS	09:43:00	am	6		09:51:00	10:10:00	R	L	disassortative	cmy	starch	SxC	0	NA	NA	NA	00:08:00	00:19:00	8	19
2014-05-01	Canton s	1	matched	8	FS	09:43:00	am	7		09:52:00	10:07:00	R	L	disassortative	cmy	starch	SxC	0	NA	NA	NA	00:09:00	00:15:00	9	15
2014-05-01	Canton s	1	matched	8	FS	09:43:00	am	10		09:55:00	10:17:00	R	L	disassortative	cmy	starch	SxC	0	NA	NA	NA	00:12:00	00:22:00	12	22
2014-05-01	Canton s	1	matched	8	FS	09:43:00	am	11		09:56:00	10:18:00	R	L	disassortative	cmy	starch	SxC	0	NA	NA	NA	00:13:00	00:22:00	13	22
2014-05-01	Canton s	1	matched	8	FS	09:43:00	am	12		09:57:00	10:24:00	R	L	disassortative	cmy	starch	SxC	0	NA	NA	NA	00:14:00	00:27:00	14	27
2014-05-01	Canton s	2	matched	8	FS	09:43:00	am	13		10:00:00	10:24:00	R	L	disassortative	cmy	starch	SxC	0	NA	NA	NA	00:17:00	00:24:00	17	24
2014-05-01	Canton s	1	matched	7	FS	09:37:00	am	2		09:46:00	10:01:00	NA	L	NA	NA	starch	NA	NA	NA	NA	NA	00:09:00	00:15:00	9	15
2014-05-01	Canton s	1	matched	7	FS	09:37:00	am	1		NA	NA	NA	NA	NA	NA	NA	NA	NA	NA	NA	NA	#VALUE!	#VALUE!	#VALUE!	#VALUE!
2014-05-07	Canton s	2	matched	7	FS	10:06:00	am	4		10:24:00	10:42:00	R	R	assortative	starch	starch	starch	1	NA	NA	NA	00:18:00	00:18:00	18	18
2014-05-07	Canton s	2	matched	7	FS	10:06:00	am	6		10:26:00	10:42:00	R	R	assortative	starch	starch	starch	1	NA	NA	NA	00:20:00	00:16:00	20	16
2014-05-07	Canton s	2	matched	7	FS	10:06:00	am	8		10:32:00	10:44:00	R	R	assortative	starch	starch	starch	1	NA	NA	NA	00:26:00	00:12:00	26	12
2014-05-07	Canton s	2	matched	7	FS	10:06:00	am	13		10:40:00	10:53:00	R	R	assortative	starch	starch	starch	1	NA	NA	NA	00:34:00	00:13:00	34	13
2014-05-07	Canton s	2	matched	8	FS	10:15:00	am	2		10:21:00	10:42:00	R	R	assortative	starch	starch	starch	1	NA	NA	NA	00:06:00	00:21:00	6	21
2014-05-07	Canton s	2	matched	8	FS	10:15:00	am	5		10:28:00	10:45:00	R	R	assortative	starch	starch	starch	1	NA	NA	NA	00:13:00	00:17:00	13	17
2014-05-07	Canton s	2	matched	8	FS	10:15:00	am	6		10:32:00	10:45:00	R	R	assortative	starch	starch	starch	1	NA	NA	NA	00:17:00	00:13:00	17	13
2014-05-07	Canton s	2	matched	8	FS	10:15:00	am	7		10:35:00	10:47:00	R	R	assortative	starch	starch	starch	1	NA	NA	NA	00:20:00	00:12:00	20	12
2014-05-07	Canton s	2	matched	8	FS	10:15:00	am	9		10:37:00	10:48:00	R	R	assortative	starch	starch	starch	1	NA	NA	NA	00:22:00	00:11:00	22	11
2014-05-07	Canton s	2	matched	8	FS	10:15:00	am	10		10:37:00	10:40:00	R	R	assortative	starch	starch	starch	1	NA	NA	NA	00:22:00	00:03:00	22	3
2014-05-07	Canton s	2	matched	8	FS	10:15:00	am	14		10:48:00	10:58:00	R	R	assortative	starch	starch	starch	1	NA	NA	NA	00:33:00	00:10:00	33	10
2014-05-07	Canton s	2	matched	8	FS	10:15:00	am	16		10:49:00	NA	R	R	assortative	starch	starch	starch	1	NA	NA	NA	00:34:00	#VALUE!	34	#VALUE!
2014-05-07	Canton s	2	matched	8	FS	10:15:00	am	17		10:50:00	10:59:00	R	R	assortative	starch	starch	starch	1	NA	NA	NA	00:35:00	00:09:00	35	9
2014-05-07	Canton s	2	matched	8	FS	10:15:00	am	18		10:51:00	10:58:00	R	R	assortative	starch	starch	starch	1	NA	NA	NA	00:36:00	00:07:00	36	7
2014-05-07	Canton s	2	matched	7	FS	10:06:00	am	1		10:17:00	10:41:00	L	R	disassortative	cmy	starch	SxC	0	NA	NA	NA	00:11:00	00:24:00	11	24
2014-05-07	Canton s	2	matched	7	FS	10:06:00	am	2		10:19:00	10:41:00	L	R	disassortative	cmy	starch	SxC	0	NA	NA	NA	00:13:00	00:22:00	13	22
2014-05-07	Canton s	2	matched	7	FS	10:06:00	am	3		10:23:00	10:38:00	L	R	disassortative	cmy	starch	SxC	0	NA	NA	NA	00:17:00	00:15:00	17	15
2014-05-07	Canton s	2	matched	7	FS	10:06:00	am	5		10:25:00	10:42:00	L	R	disassortative	cmy	starch	SxC	0	NA	NA	NA	00:19:00	00:17:00	19	17
2014-05-07	Canton s	2	matched	7	FS	10:06:00	am	7		10:31:00	10:46:00	L	R	disassortative	cmy	starch	SxC	0	NA	NA	NA	00:25:00	00:15:00	25	15
2014-05-07	Canton s	2	matched	7	FS	10:06:00	am	9		10:39:00	10:54:00	L	R	disassortative	cmy	starch	SxC	0	NA	NA	NA	00:33:00	00:15:00	33	15
2014-05-07	Canton s	2	matched	7	FS	10:06:00	am	10		10:39:00	10:54:00	L	R	disassortative	cmy	starch	SxC	0	NA	NA	NA	00:33:00	00:15:00	33	15
2014-05-07	Canton s	2	matched	7	FS	10:06:00	am	11		10:39:00	10:52:00	L	R	disassortative	cmy	starch	SxC	0	NA	NA	NA	00:33:00	00:13:00	33	13
2014-05-07	Canton s	2	matched	7	FS	10:06:00	am	12		10:40:00	10:54:00	L	R	disassortative	cmy	starch	SxC	0	NA	NA	NA	00:34:00	00:14:00	34	14
2014-05-07	Canton s	2	matched	7	FS	10:06:00	am	14		10:44:00	10:54:00	L	R	disassortative	cmy	starch	SxC	0	NA	NA	NA	00:38:00	00:10:00	38	10
2014-05-07	Canton s	2	matched	7	FS	10:06:00	am	15		10:45:00	10:53:00	L	R	disassortative	cmy	starch	SxC	0	NA	NA	NA	00:39:00	00:08:00	39	8
2014-05-07	Canton s	2	matched	7	FS	10:06:00	am	16		10:45:00	10:53:00	L	R	disassortative	cmy	starch	SxC	0	NA	NA	NA	00:39:00	00:08:00	39	8
2014-05-07	Canton s	2	matched	7	FS	10:06:00	am	17		10:46:00	10:54:00	L	R	disassortative	cmy	starch	SxC	0	NA	NA	NA	00:40:00	00:08:00	40	8
2014-05-07	Canton s	2	matched	8	FS	10:15:00	am	1		10:19:00	10:40:00	L	R	disassortative	cmy	starch	SxC	0	NA	NA	NA	00:04:00	00:21:00	4	21
2014-05-07	Canton s	2	matched	8	FS	10:15:00	am	3		10:27:00	10:40:00	L	R	disassortative	cmy	starch	SxC	0	NA	NA	NA	00:12:00	00:13:00	12	13
2014-05-07	Canton s	2	matched	8	FS	10:15:00	am	4		10:27:00	10:42:00	L	R	disassortative	cmy	starch	SxC	0	NA	NA	NA	00:12:00	00:15:00	12	15
2014-05-07	Canton s	2	matched	8	FS	10:15:00	am	8		10:37:00	10:47:00	L	R	disassortative	cmy	starch	SxC	0	NA	NA	NA	00:22:00	00:10:00	22	10
2014-05-07	Canton s	2	matched	8	FS	10:15:00	am	11		10:38:00	10:50:00	L	R	disassortative	cmy	starch	SxC	0	NA	NA	NA	00:23:00	00:12:00	23	12
2014-05-07	Canton s	2	matched	8	FS	10:15:00	am	12		10:47:00	11:04:00	L	R	disassortative	cmy	starch	SxC	0	NA	NA	NA	00:32:00	00:17:00	32	17
2014-05-07	Canton s	2	matched	8	FS	10:15:00	am	13		10:47:00	11:04:00	L	R	disassortative	cmy	starch	SxC	0	NA	NA	NA	00:32:00	00:17:00	32	17
2014-05-07	Canton s	2	matched	8	FS	10:15:00	am	15		10:48:00	11:05:00	L	R	disassortative	cmy	starch	SxC	0	NA	NA	NA	00:33:00	00:17:00	33	17
2014-05-07	Canton s	2	matched	8	FS	10:15:00	am	19		NA	NA	NA	NA	NA	NA	NA	NA	NA	NA	NA	NA	#VALUE!	#VALUE!	#VALUE!	#VALUE!
2014-05-15	Canton s	2	matched	7	FS	09:49:00	am	1		09:54:00	10:12:00	L	L	assortative	starch	starch	starch	1	NA	NA	NA	00:05:00	00:18:00	5	18
2014-05-15	Canton s	2	matched	7	FS	09:49:00	am	2		09:56:00	10:14:00	L	L	assortative	starch	starch	starch	1	NA	NA	NA	00:07:00	00:18:00	7	18
2014-05-15	Canton s	2	matched	7	FS	09:49:00	am	3		09:57:00	10:18:00	L	L	assortative	starch	starch	starch	1	NA	NA	NA	00:08:00	00:21:00	8	21
2014-05-15	Canton s	2	matched	7	FS	09:49:00	am	4		10:02:00	10:14:00	L	L	assortative	starch	starch	starch	1	NA	NA	NA	00:13:00	00:12:00	13	12
2014-05-15	Canton s	2	matched	7	FS	09:49:00	am	5		10:04:00	10:26:00	L	L	assortative	starch	starch	starch	1	NA	NA	NA	00:15:00	00:22:00	15	22
2014-05-15	Canton s	2	matched	7	FS	09:49:00	am	6		10:09:00	10:30:00	L	L	assortative	starch	starch	starch	1	NA	NA	NA	00:20:00	00:21:00	20	21
2014-05-15	Canton s	2	matched	7	FS	09:49:00	am	7		10:29:00	10:36:00	L	L	assortative	starch	starch	starch	1	NA	NA	NA	00:40:00	00:07:00	40	7
2014-05-15	Canton s	2	matched	7	FS	09:49:00	am	8		10:31:00	10:48:00	L	L	assortative	starch	starch	starch	1	NA	NA	NA	00:42:00	00:17:00	42	17
2014-05-15	Canton s	2	matched	7	FS	09:49:00	am	9		10:34:00	10:52:00	L	L	assortative	starch	starch	starch	1	NA	NA	NA	00:45:00	00:18:00	45	18
2014-05-15	Canton s	2	matched	7	FS	09:49:00	am	10		10:35:00	10:59:00	L	L	assortative	starch	starch	starch	1	NA	NA	NA	00:46:00	00:24:00	46	24
2014-05-15	Canton s	2	matched	7	FS	09:49:00	am	11		10:43:00	10:59:00	L	L	assortative	starch	starch	starch	1	NA	NA	NA	00:54:00	00:16:00	54	16
2014-05-15	Canton s	2	matched	8	FS	09:55:00	am	2		10:03:00	10:18:00	L	L	assortative	starch	starch	starch	1	NA	NA	NA	00:08:00	00:15:00	8	15
2014-05-15	Canton s	2	matched	8	FS	09:55:00	am	3		10:04:00	10:23:00	L	L	assortative	starch	starch	starch	1	NA	NA	NA	00:09:00	00:19:00	9	19
2014-05-15	Canton s	2	matched	8	FS	09:55:00	am	4		10:04:00	10:26:00	L	L	assortative	starch	starch	starch	1	NA	NA	NA	00:09:00	00:22:00	9	22
2014-05-15	Canton s	2	matched	8	FS	09:55:00	am	6		10:08:00	10:26:00	L	L	assortative	starch	starch	starch	1	NA	NA	NA	00:13:00	00:18:00	13	18
2014-05-15	Canton s	2	matched	8	FS	09:55:00	am	8		10:14:00	10:37:00	L	L	assortative	starch	starch	starch	1	NA	NA	NA	00:19:00	00:23:00	19	23
2014-05-15	Canton s	2	matched	8	FS	09:55:00	am	10		10:28:00	10:45:00	L	L	assortative	starch	starch	starch	1	NA	NA	NA	00:33:00	00:17:00	33	17
2014-05-15	Canton s	2	matched	8	FS	09:55:00	am	11		10:34:00	10:53:00	L	L	assortative	starch	starch	starch	1	NA	NA	NA	00:39:00	00:19:00	39	19
2014-05-15	Canton s	2	matched	8	FS	09:55:00	am	12		10:36:00	11:06:00	L	L	assortative	starch	starch	starch	1	NA	NA	NA	00:41:00	00:30:00	41	30
2014-05-15	Canton s	2	matched	8	FS	09:55:00	am	13		10:48:00	11:04:00	L	L	assortative	starch	starch	starch	1	NA	NA	NA	00:53:00	00:16:00	53	16
2014-05-15	Canton s	1	matched	8	FS	09:55:00	am	14		10:48:00	11:06:00	L	L	assortative	starch	starch	starch	1	NA	NA	NA	00:53:00	00:18:00	53	18
2014-05-15	Canton s	1	matched	8	FS	09:55:00	am	15		10:52:00	11:07:00	L	L	assortative	starch	starch	starch	1	NA	NA	NA	00:57:00	00:15:00	57	15
2014-05-15	Canton s	2	matched	7	FS	09:49:00	am	12		10:46:00	11:05:00	R	L	disassortative	cmy	starch	SxC	0	NA	NA	NA	00:57:00	00:19:00	57	19
2014-05-15	Canton s	2	matched	8	FS	09:55:00	am	1		10:01:00	10:22:00	R	L	disassortative	cmy	starch	SxC	0	NA	NA	NA	00:06:00	00:21:00	6	21
2014-05-15	Canton s	2	matched	8	FS	09:55:00	am	5		10:06:00	10:26:00	R	L	disassortative	cmy	starch	SxC	0	NA	NA	NA	00:11:00	00:20:00	11	20
2014-05-15	Canton s	2	matched	8	FS	09:55:00	am	7		10:09:00	10:27:00	R	L	disassortative	cmy	starch	SxC	0	NA	NA	NA	00:14:00	00:18:00	14	18
2014-05-15	Canton s	2	matched	8	FS	09:55:00	am	9		10:19:00	10:38:00	R	L	disassortative	cmy	starch	SxC	0	NA	NA	NA	00:24:00	00:19:00	24	19
2014-05-22	Canton s	1	matched	4	FS	09:33:00	am	3		09:49:00	NA	R	R	assortative	starch	starch	starch	1	NA	NA	NA	00:16:00	#VALUE!	16	#VALUE!
2014-05-22	Canton s	1	matched	4	FS	09:33:00	am	8		10:07:00	10:21:00	R	R	assortative	starch	starch	starch	1	NA	NA	NA	00:34:00	00:14:00	34	14
2014-05-22	Canton s	1	matched	4	FS	09:33:00	am	10		10:17:00	10:41:00	R	R	assortative	starch	starch	starch	1	NA	NA	NA	00:44:00	00:24:00	44	24
2014-05-22	Canton s	2	matched	4	FS	09:33:00	am	12		10:30:00	10:49:00	R	R	assortative	starch	starch	starch	1	NA	NA	NA	00:57:00	00:19:00	57	19
2014-05-22	Canton s	1	matched	4	FS	09:33:00	am	1		09:39:00	?	L	R	disassortative	cmy	starch	SxC	0	NA	NA	NA	00:06:00	#VALUE!	6	#VALUE!
2014-05-22	Canton s	1	matched	4	FS	09:33:00	am	2		09:49:00	10:05:00	L	R	disassortative	cmy	starch	SxC	0	NA	NA	NA	00:16:00	00:16:00	16	16
2014-05-22	Canton s	1	matched	4	FS	09:33:00	am	4		09:49:00	10:11:00	L	R	disassortative	cmy	starch	SxC	0	NA	NA	NA	00:16:00	00:22:00	16	22
2014-05-22	Canton s	1	matched	4	FS	09:33:00	am	5		09:56:00	10:12:00	L	R	disassortative	cmy	starch	SxC	0	NA	NA	NA	00:23:00	00:16:00	23	16
2014-05-22	Canton s	1	matched	4	FS	09:33:00	am	6		09:58:00	10:17:00	L	R	disassortative	cmy	starch	SxC	0	NA	NA	NA	00:25:00	00:19:00	25	19
2014-05-22	Canton s	1	matched	4	FS	09:33:00	am	7		10:02:00	10:24:00	L	R	disassortative	cmy	starch	SxC	0	NA	NA	NA	00:29:00	00:22:00	29	22
2014-05-22	Canton s	1	matched	4	FS	09:33:00	am	9		10:09:00	10:32:00	L	R	disassortative	cmy	starch	SxC	0	NA	NA	NA	00:36:00	00:23:00	36	23
2014-05-22	Canton s	2	matched	4	FS	09:33:00	am	11		10:23:00	10:42:00	L	R	disassortative	cmy	starch	SxC	0	NA	NA	NA	00:50:00	00:19:00	50	19
2014-05-28	Canton s	2	matched	4	FS	11:05:00	am	2		11:17:00	11:38:00	L	L	assortative	starch	starch	starch	1	NA	NA	NA	00:12:00	00:21:00	12	21
2014-05-28	Canton s	2	matched	4	FS	11:05:00	am	3		11:17:00	11:38:00	L	L	assortative	starch	starch	starch	1	NA	NA	NA	00:12:00	00:21:00	12	21
2014-05-28	Canton s	2	matched	4	FS	11:05:00	am	5		11:18:00	11:35:00	L	L	assortative	starch	starch	starch	1	NA	NA	NA	00:13:00	00:17:00	13	17
2014-05-28	Canton s	1	matched	4	FS	11:05:00	am	6		11:20:00	11:38:00	L	L	assortative	starch	starch	starch	1	NA	NA	NA	00:15:00	00:18:00	15	18
2014-05-28	Canton s	2	matched	4	FS	11:05:00	am	1		11:13:00	11:35:00	R	L	disassortative	cmy	starch	SxC	0	NA	NA	NA	00:08:00	00:22:00	8	22
2014-05-28	Canton s	2	matched	4	FS	11:05:00	am	4		11:18:00	11:38:00	R	L	disassortative	cmy	starch	SxC	0	NA	NA	NA	00:13:00	00:20:00	13	20
2014-05-28	Canton s	1	matched	4	FS	11:05:00	am	7		11:35:00	11:54:00	R	L	disassortative	cmy	starch	SxC	0	NA	NA	NA	00:30:00	00:19:00	30	19
2014-06-05	Canton s	1	matched	3	FS	09:13:00	am	1		09:23:00	09:36:00	R	R	assortative	starch	starch	starch	1	NA	NA	NA	00:10:00	00:13:00	10	13
2014-06-05	Canton s	1	matched	3	FS	09:13:00	am	3		09:24:00	09:42:00	R	R	assortative	starch	starch	starch	1	NA	NA	NA	00:11:00	00:18:00	11	18
2014-06-05	Canton s	1	matched	3	FS	09:13:00	am	4		09:24:00	09:42:00	R	R	assortative	starch	starch	starch	1	NA	NA	NA	00:11:00	00:18:00	11	18
2014-06-05	Canton s	1	matched	3	FS	09:13:00	am	8		09:31:00	09:56:00	R	R	assortative	starch	starch	starch	1	NA	NA	NA	00:18:00	00:25:00	18	25
2014-06-05	Canton s	1	matched	3	FS	09:13:00	am	9		09:40:00	10:02:00	R	R	assortative	starch	starch	starch	1	NA	NA	NA	00:27:00	00:22:00	27	22
2014-06-05	Canton s	1	matched	3	FS	09:13:00	am	12		09:47:00	10:02:00	R	R	assortative	starch	starch	starch	1	NA	NA	NA	00:34:00	00:15:00	34	15
2014-06-05	Canton s	1	matched	3	FS	09:13:00	am	15		10:02:00	10:24:00	R	R	assortative	starch	starch	starch	1	NA	NA	NA	00:49:00	00:22:00	49	22
2014-06-05	Canton s	1	matched	3	FS	09:13:00	am	2		09:24:00	09:37:00	L	R	disassortative	cmy	starch	SxC	0	NA	NA	NA	00:11:00	00:13:00	11	13
2014-06-05	Canton s	1	matched	3	FS	09:13:00	am	5		09:27:00	09:44:00	L	R	disassortative	cmy	starch	SxC	0	NA	NA	NA	00:14:00	00:17:00	14	17
2014-06-05	Canton s	1	matched	3	FS	09:13:00	am	6		09:28:00	09:44:00	L	R	disassortative	cmy	starch	SxC	0	NA	NA	NA	00:15:00	00:16:00	15	16
2014-06-05	Canton s	1	matched	3	FS	09:13:00	am	7		09:29:00	09:52:00	L	R	disassortative	cmy	starch	SxC	0	NA	NA	NA	00:16:00	00:23:00	16	23
2014-06-05	Canton s	1	matched	3	FS	09:13:00	am	10		09:43:00	10:01:00	L	R	disassortative	cmy	starch	SxC	0	NA	NA	NA	00:30:00	00:18:00	30	18
2014-06-05	Canton s	1	matched	3	FS	09:13:00	am	11		09:44:00	10:01:00	L	R	disassortative	cmy	starch	SxC	0	NA	NA	NA	00:31:00	00:17:00	31	17
2014-06-05	Canton s	1	matched	3	FS	09:13:00	am	13		09:56:00	10:18:00	L	R	disassortative	cmy	starch	SxC	0	NA	NA	NA	00:43:00	00:22:00	43	22
2014-06-05	Canton s	1	matched	3	FS	09:13:00	am	14		10:00:00	10:18:00	L	R	disassortative	cmy	starch	SxC	0	NA	NA	NA	00:47:00	00:18:00	47	18
2014-04-17	Canton s	1	matched	3	MC	09:29:00	am	1	NA	09:38:00	10:20:00	R	R	assortative	cmy	cmy	cmy	1	NA	NA	NA	00:09:00	00:42:00	9	42
2014-04-17	Canton s	1	matched	3	MC	09:29:00	am	3	NA	09:46:00	10:10:00	R	R	assortative	cmy	cmy	cmy	1	NA	NA	NA	00:17:00	00:24:00	17	24
2014-04-17	Canton s	1	matched	3	MC	09:29:00	am	4	NA	09:51:00	10:11:00	R	R	assortative	cmy	cmy	cmy	1	NA	NA	NA	00:22:00	00:20:00	22	20
2014-04-17	Canton s	1	matched	3	MC	09:29:00	am	5	NA	09:54:00	10:11:00	R	R	assortative	cmy	cmy	cmy	1	NA	NA	NA	00:25:00	00:17:00	25	17
2014-04-17	Canton s	1	matched	3	MC	09:29:00	am	7	NA	09:57:00	10:33:00	R	R	assortative	cmy	cmy	cmy	1	NA	NA	NA	00:28:00	00:36:00	28	36
2014-04-17	Canton s	1	matched	3	MC	09:29:00	am	8	NA	09:58:00	10:12:00	R	R	assortative	cmy	cmy	cmy	1	NA	NA	NA	00:29:00	00:14:00	29	14
2014-04-17	Canton s	1	matched	3	MC	09:29:00	am	10	NA	10:01:00	10:20:00	R	R	assortative	cmy	cmy	cmy	1	NA	NA	NA	00:32:00	00:19:00	32	19
2014-04-17	Canton s	1	matched	3	MC	09:29:00	am	12	NA	10:04:00	10:13:00	R	R	assortative	cmy	cmy	cmy	1	NA	NA	NA	00:35:00	00:09:00	35	9
2014-04-17	Canton s	1	matched	3	MC	09:29:00	am	13	NA	10:05:00	10:28:00	R	R	assortative	cmy	cmy	cmy	1	NA	NA	NA	00:36:00	00:23:00	36	23
2014-04-17	Canton s	1	matched	3	MC	09:29:00	am	14	NA	10:08:00	10:28:00	R	R	assortative	cmy	cmy	cmy	1	NA	NA	NA	00:39:00	00:20:00	39	20
2014-04-17	Canton s	1	matched	3	MC	09:29:00	am	15	NA	10:09:00	10:20:00	R	R	assortative	cmy	cmy	cmy	1	NA	NA	NA	00:40:00	00:11:00	40	11
2014-04-17	Canton s	1	matched	3	MC	09:29:00	am	17	NA	10:18:00	10:34:00	R	R	assortative	cmy	cmy	cmy	1	NA	NA	NA	00:49:00	00:16:00	49	16
2014-04-17	Canton s	1	matched	3	MC	09:29:00	am	18	NA	10:20:00	10:34:00	R	R	assortative	cmy	cmy	cmy	1	NA	NA	NA	00:51:00	00:14:00	51	14
2014-04-17	Canton s	1	matched	4	MC	09:36:00	am	2	NA	09:46:00	10:24:00	R	R	assortative	cmy	cmy	cmy	1	NA	NA	NA	00:10:00	00:38:00	10	38
2014-04-17	Canton s	1	matched	4	MC	09:36:00	am	3	NA	09:49:00	10:33:00	R	R	assortative	cmy	cmy	cmy	1	NA	NA	NA	00:13:00	00:44:00	13	44
2014-04-17	Canton s	1	matched	4	MC	09:36:00	am	4	NA	09:51:00	10:15:00	R	R	assortative	cmy	cmy	cmy	1	NA	NA	NA	00:15:00	00:24:00	15	24
2014-04-17	Canton s	1	matched	4	MC	09:36:00	am	8	NA	09:59:00	10:30:00	R	R	assortative	cmy	cmy	cmy	1	NA	NA	NA	00:23:00	00:31:00	23	31
2014-04-17	Canton s	1	matched	4	MC	09:36:00	am	9	NA	10:02:00	10:18:00	R	R	assortative	cmy	cmy	cmy	1	NA	NA	NA	00:26:00	00:16:00	26	16
2014-04-17	Canton s	1	matched	4	MC	09:36:00	am	11	NA	10:02:00	10:17:00	R	R	assortative	cmy	cmy	cmy	1	NA	NA	NA	00:26:00	00:15:00	26	15
2014-04-17	Canton s	1	matched	4	MC	09:36:00	am	12	NA	10:12:00	10:32:00	R	R	assortative	cmy	cmy	cmy	1	NA	NA	NA	00:36:00	00:20:00	36	20
2014-04-17	Canton s	1	matched	4	MC	09:36:00	am	15	NA	10:18:00	10:35:00	R	R	assortative	cmy	cmy	cmy	1	NA	NA	NA	00:42:00	00:17:00	42	17
2014-04-17	Canton s	1	matched	4	MC	09:36:00	am	17	NA	10:25:00	10:33:00	R	R	assortative	cmy	cmy	cmy	1	NA	NA	NA	00:49:00	00:08:00	49	8
2014-04-17	Canton s	1	matched	4	MC	09:36:00	am	18	NA	10:30:00	10:48:00	R	R	assortative	cmy	cmy	cmy	1	NA	NA	NA	00:54:00	00:18:00	54	18
2014-04-17	Canton s	1	matched	3	MC	09:29:00	am	2	NA	09:42:00	10:25:00	R	L	disassortative	cmy	starch	SxC	0	NA	NA	NA	00:13:00	00:43:00	13	43
2014-04-17	Canton s	1	matched	3	MC	09:29:00	am	6	NA	09:56:00	10:12:00	R	L	disassortative	cmy	starch	SxC	0	NA	NA	NA	00:27:00	00:16:00	27	16
2014-04-17	Canton s	1	matched	3	MC	09:29:00	am	9	NA	10:01:00	10:13:00	R	L	disassortative	cmy	starch	SxC	0	NA	NA	NA	00:32:00	00:12:00	32	12
2014-04-17	Canton s	1	matched	3	MC	09:29:00	am	11	NA	10:02:00	10:11:00	R	L	disassortative	cmy	starch	SxC	0	NA	NA	NA	00:33:00	00:09:00	33	9
2014-04-17	Canton s	1	matched	3	MC	09:29:00	am	16	NA	10:15:00	10:31:00	R	L	disassortative	cmy	starch	SxC	0	NA	NA	NA	00:46:00	00:16:00	46	16
2014-04-17	Canton s	1	matched	3	MC	09:29:00	am	19	NA	10:22:00	10:34:00	R	L	disassortative	cmy	starch	SxC	0	NA	NA	NA	00:53:00	00:12:00	53	12
2014-04-17	Canton s	1	matched	4	MC	09:36:00	am	1	NA	09:43:00	10:11:00	R	L	disassortative	cmy	starch	SxC	0	NA	NA	NA	00:07:00	00:28:00	7	28
2014-04-17	Canton s	1	matched	4	MC	09:36:00	am	5	NA	09:52:00	10:12:00	R	L	disassortative	cmy	starch	SxC	0	NA	NA	NA	00:16:00	00:20:00	16	20
2014-04-17	Canton s	1	matched	4	MC	09:36:00	am	6	NA	09:56:00	10:11:00	R	L	disassortative	cmy	starch	SxC	0	NA	NA	NA	00:20:00	00:15:00	20	15
2014-04-17	Canton s	1	matched	4	MC	09:36:00	am	7	NA	09:57:00	10:10:00	R	L	disassortative	cmy	starch	SxC	0	NA	NA	NA	00:21:00	00:13:00	21	13
2014-04-17	Canton s	1	matched	4	MC	09:36:00	am	10	NA	10:02:00	10:17:00	R	L	disassortative	cmy	starch	SxC	0	NA	NA	NA	00:26:00	00:15:00	26	15
2014-04-17	Canton s	1	matched	4	MC	09:36:00	am	13	NA	10:17:00	10:35:00	R	L	disassortative	cmy	starch	SxC	0	NA	NA	NA	00:41:00	00:18:00	41	18
2014-04-17	Canton s	1	matched	4	MC	09:36:00	am	14	NA	10:17:00	10:33:00	R	L	disassortative	cmy	starch	SxC	0	NA	NA	NA	00:41:00	00:16:00	41	16
2014-04-17	Canton s	1	matched	4	MC	09:36:00	am	16	NA	10:19:00	10:24:00	NA	NA	NA	NA	NA	NA	NA	NA	NA	NA	00:43:00	00:05:00	43	5
2014-04-24	Canton s	2	matched	4	MC	10:10:00	am	1	A6	10:26:00	10:44:00	L	L	assortative	cmy	cmy	cmy	1	NA	NA	Michael	00:16:00	00:18:00	16	18
2014-04-24	Canton s	2	matched	4	MC	10:10:00	am	2	A1	10:26:00	10:44:00	L	L	assortative	cmy	cmy	cmy	1	NA	NA	Michael	00:16:00	00:18:00	16	18
2014-04-24	Canton s	2	matched	4	MC	10:10:00	am	3	A2	10:28:00	10:41:00	L	L	assortative	cmy	cmy	cmy	1	NA	NA	Michael	00:18:00	00:13:00	18	13
2014-04-24	Canton s	2	matched	4	MC	10:10:00	am	4	A4	10:34:00	10:56:00	L	L	assortative	cmy	cmy	cmy	1	NA	NA	Michael	00:24:00	00:22:00	24	22
2014-04-24	Canton s	2	matched	4	MC	10:10:00	am	5	A5	10:37:00	10:56:00	L	L	assortative	cmy	cmy	cmy	1	NA	NA	Michael	00:27:00	00:19:00	27	19
2014-04-24	Canton s	2	matched	4	MC	10:10:00	am	6	A3	10:40:00	10:59:00	L	L	assortative	cmy	cmy	cmy	1	NA	NA	Michael	00:30:00	00:19:00	30	19
2014-04-24	Canton s	2	matched	7	MC	10:06:00	am	1	B2	10:11:00	10:33:00	L	L	assortative	cmy	cmy	cmy	1	NA	NA	Michael	00:05:00	00:22:00	5	22
2014-04-24	Canton s	2	matched	7	MC	10:06:00	am	2	A1	10:13:00	10:35:00	L	L	assortative	cmy	cmy	cmy	1	NA	NA	Michael	00:07:00	00:22:00	7	22
2014-04-24	Canton s	2	matched	7	MC	10:06:00	am	3	D1	10:14:00	11:01:00	L	L	assortative	cmy	cmy	cmy	1	NA	NA	Michael	00:08:00	00:47:00	8	47
2014-04-24	Canton s	2	matched	7	MC	10:06:00	am	4	A2	10:15:00	10:35:00	L	L	assortative	cmy	cmy	cmy	1	NA	NA	Michael	00:09:00	00:20:00	9	20
2014-04-24	Canton s	2	matched	7	MC	10:06:00	am	6	D3	10:20:00	10:39:00	L	L	assortative	cmy	cmy	cmy	1	NA	NA	Michael	00:14:00	00:19:00	14	19
2014-04-24	Canton s	2	matched	7	MC	10:06:00	am	7	D5	10:20:00	10:39:00	L	L	assortative	cmy	cmy	cmy	1	NA	NA	Michael	00:14:00	00:19:00	14	19
2014-04-24	Canton s	2	matched	7	MC	10:06:00	am	9	B3	10:23:00	10:46:00	L	L	assortative	cmy	cmy	cmy	1	NA	NA	Michael	00:17:00	00:23:00	17	23
2014-04-24	Canton s	2	matched	7	MC	10:06:00	am	12	C4	10:23:00	10:42:00	L	L	assortative	cmy	cmy	cmy	1	NA	NA	Michael	00:17:00	00:19:00	17	19
2014-04-24	Canton s	2	matched	7	MC	10:06:00	am	14	A5	10:29:00	10:48:00	L	L	assortative	cmy	cmy	cmy	1	NA	NA	Michael	00:23:00	00:19:00	23	19
2014-04-24	Canton s	2	matched	7	MC	10:06:00	am	15	A6	10:29:00	10:46:00	L	L	assortative	cmy	cmy	cmy	1	NA	NA	Michael	00:23:00	00:17:00	23	17
2014-04-24	Canton s	2	matched	7	MC	10:06:00	am	16	B4	10:29:00	10:50:00	L	L	assortative	cmy	cmy	cmy	1	NA	NA	Michael	00:23:00	00:21:00	23	21
2014-04-24	Canton s	2	matched	7	MC	10:06:00	am	18	A3	10:29:00	10:51:00	L	L	assortative	cmy	cmy	cmy	1	NA	NA	Michael	00:23:00	00:22:00	23	22
2014-04-24	Canton s	2	matched	7	MC	10:06:00	am	19	C1	10:35:00	10:51:00	L	L	assortative	cmy	cmy	cmy	1	NA	NA	Michael	00:29:00	00:16:00	29	16
2014-04-24	Canton s	2	matched	7	MC	10:06:00	am	20	D4	10:36:00	10:55:00	L	L	assortative	cmy	cmy	cmy	1	NA	NA	Michael	00:30:00	00:19:00	30	19
2014-04-24	Canton s	2	matched	7	MC	10:06:00	am	5	C3	10:20:00	10:39:00	L	R	disassortative	cmy	starch	SxC	0	NA	NA	Michael	00:14:00	00:19:00	14	19
2014-04-24	Canton s	2	matched	7	MC	10:06:00	am	8	C5	10:20:00	10:41:00	L	R	disassortative	cmy	starch	SxC	0	NA	NA	Michael	00:14:00	00:21:00	14	21
2014-04-24	Canton s	2	matched	7	MC	10:06:00	am	10	B1	10:23:00	10:39:00	L	R	disassortative	cmy	starch	SxC	0	NA	NA	Michael	00:17:00	00:16:00	17	16
2014-04-24	Canton s	2	matched	7	MC	10:06:00	am	11	C2	10:23:00	10:42:00	L	R	disassortative	cmy	starch	SxC	0	NA	NA	Michael	00:17:00	00:19:00	17	19
2014-04-24	Canton s	2	matched	7	MC	10:06:00	am	13	D2	10:23:00	10:39:00	L	R	disassortative	cmy	starch	SxC	0	NA	NA	Michael	00:17:00	00:16:00	17	16
2014-04-24	Canton s	2	matched	7	MC	10:06:00	am	17	B5	10:29:00	10:49:00	L	R	disassortative	cmy	starch	SxC	0	NA	NA	Michael	00:23:00	00:20:00	23	20
2014-04-24	Canton s	2	matched	7	MC	10:06:00	am	21	A4	10:43:00	10:59:00	L	R	disassortative	cmy	starch	SxC	0	NA	NA	Michael	00:37:00	00:16:00	37	16
2014-04-24	Canton s	2	matched	7	MC	10:06:00	am	22	B6	10:51:00	11:04:00	L	R	disassortative	cmy	starch	SxC	0	NA	NA	Michael	00:45:00	00:13:00	45	13
2014-05-01	Canton s	1	matched	3	MC	09:50:00	am	2		09:58:00	10:13:00	R	R	assortative	cmy	cmy	cmy	1	NA	NA	NA	00:08:00	00:15:00	8	15
2014-05-01	Canton s	1	matched	3	MC	09:50:00	am	3		09:59:00	10:13:00	R	R	assortative	cmy	cmy	cmy	1	NA	NA	NA	00:09:00	00:14:00	9	14
2014-05-01	Canton s	1	matched	3	MC	09:50:00	am	4		09:59:00	10:13:00	R	R	assortative	cmy	cmy	cmy	1	NA	NA	NA	00:09:00	00:14:00	9	14
2014-05-01	Canton s	1	matched	3	MC	09:50:00	am	5		09:59:00	10:16:00	R	R	assortative	cmy	cmy	cmy	1	NA	NA	NA	00:09:00	00:17:00	9	17
2014-05-01	Canton s	1	matched	3	MC	09:50:00	am	8		10:04:00	10:19:00	R	R	assortative	cmy	cmy	cmy	1	NA	NA	NA	00:14:00	00:15:00	14	15
2014-05-01	Canton s	1	matched	3	MC	09:50:00	am	10		10:05:00	10:18:00	R	R	assortative	cmy	cmy	cmy	1	NA	NA	NA	00:15:00	00:13:00	15	13
2014-05-01	Canton s	1	matched	3	MC	09:50:00	am	12		10:07:00	10:21:00	R	R	assortative	cmy	cmy	cmy	1	NA	NA	NA	00:17:00	00:14:00	17	14
2014-05-01	Canton s	1	matched	3	MC	09:50:00	am	13		10:11:00	10:21:00	R	R	assortative	cmy	cmy	cmy	1	NA	NA	NA	00:21:00	00:10:00	21	10
2014-05-01	Canton s	1	matched	3	MC	09:50:00	am	1		09:58:00	10:15:00	R	L	disassortative	cmy	starch	SxC	0	NA	NA	NA	00:08:00	00:17:00	8	17
2014-05-01	Canton s	1	matched	3	MC	09:50:00	am	6		10:02:00	10:14:00	R	L	disassortative	cmy	starch	SxC	0	NA	NA	NA	00:12:00	00:12:00	12	12
2014-05-01	Canton s	1	matched	3	MC	09:50:00	am	7		10:02:00	10:15:00	R	L	disassortative	cmy	starch	SxC	0	NA	NA	NA	00:12:00	00:13:00	12	13
2014-05-01	Canton s	1	matched	3	MC	09:50:00	am	9		10:04:00	10:18:00	R	L	disassortative	cmy	starch	SxC	0	NA	NA	NA	00:14:00	00:14:00	14	14
2014-05-01	Canton s	1	matched	3	MC	09:50:00	am	11		10:05:00	10:17:00	R	L	disassortative	cmy	starch	SxC	0	NA	NA	NA	00:15:00	00:12:00	15	12
2014-05-01	Canton s	1	matched	3	MC	09:50:00	am	14		10:14:00	10:22:00	R	L	disassortative	cmy	starch	SxC	0	NA	NA	NA	00:24:00	00:08:00	24	8
2014-05-01	Canton s	1	matched	3	MC	09:50:00	am	15		10:19:00	10:28:00	R	L	disassortative	cmy	starch	SxC	0	NA	NA	NA	00:29:00	00:09:00	29	9
2014-05-01	Canton s	1	matched	3	MC	09:50:00	am	16		10:25:00	10:36:00	R	L	disassortative	cmy	starch	SxC	0	NA	NA	NA	00:35:00	00:11:00	35	11
2014-05-01	Canton s	1	matched	3	MC	09:50:00	am	17		10:32:00	10:41:00	R	L	disassortative	cmy	starch	SxC	0	NA	NA	NA	00:42:00	00:09:00	42	9
2014-05-07	Canton s	2	matched	3	MC	09:31:00	am	1		09:44:00	10:17:00	L	L	assortative	cmy	cmy	cmy	1	NA	NA	NA	00:13:00	00:33:00	13	33
2014-05-07	Canton s	2	matched	3	MC	09:31:00	am	2		09:45:00	10:09:00	L	L	assortative	cmy	cmy	cmy	1	NA	NA	NA	00:14:00	00:24:00	14	24
2014-05-07	Canton s	2	matched	3	MC	09:31:00	am	6		09:53:00	10:18:00	L	L	assortative	cmy	cmy	cmy	1	NA	NA	NA	00:22:00	00:25:00	22	25
2014-05-07	Canton s	2	matched	3	MC	09:31:00	am	7		09:58:00	10:17:00	L	L	assortative	cmy	cmy	cmy	1	NA	NA	NA	00:27:00	00:19:00	27	19
2014-05-07	Canton s	2	matched	3	MC	09:31:00	am	10		10:16:00	10:35:00	L	L	assortative	cmy	cmy	cmy	1	NA	NA	NA	00:45:00	00:19:00	45	19
2014-05-07	Canton s	2	matched	3	MC	09:31:00	am	11		10:16:00	10:45:00	L	L	assortative	cmy	cmy	cmy	1	NA	NA	NA	00:45:00	00:29:00	45	29
2014-05-07	Canton s	2	matched	3	MC	09:31:00	am	14		10:24:00	10:43:00	L	L	assortative	cmy	cmy	cmy	1	NA	NA	NA	00:53:00	00:19:00	53	19
2014-05-07	Canton s	2	matched	3	MC	09:31:00	am	15		10:28:00	10:46:00	L	L	assortative	cmy	cmy	cmy	1	NA	NA	NA	00:57:00	00:18:00	57	18
2014-05-07	Canton s	2	matched	4	MC	09:37:00	am	2		09:46:00	NA	L	L	assortative	cmy	cmy	cmy	1	NA	NA	NA	00:09:00	#VALUE!	9	#VALUE!
2014-05-07	Canton s	2	matched	4	MC	09:37:00	am	4		09:48:00	10:11:00	L	L	assortative	cmy	cmy	cmy	1	NA	NA	NA	00:11:00	00:23:00	11	23
2014-05-07	Canton s	2	matched	4	MC	09:37:00	am	5		09:51:00	10:06:00	L	L	assortative	cmy	cmy	cmy	1	NA	NA	NA	00:14:00	00:15:00	14	15
2014-05-07	Canton s	2	matched	4	MC	09:37:00	am	6		09:51:00	10:14:00	L	L	assortative	cmy	cmy	cmy	1	NA	NA	NA	00:14:00	00:23:00	14	23
2014-05-07	Canton s	2	matched	4	MC	09:37:00	am	7		09:52:00	10:11:00	L	L	assortative	cmy	cmy	cmy	1	NA	NA	NA	00:15:00	00:19:00	15	19
2014-05-07	Canton s	2	matched	4	MC	09:37:00	am	8		09:52:00	10:12:00	L	L	assortative	cmy	cmy	cmy	1	NA	NA	NA	00:15:00	00:20:00	15	20
2014-05-07	Canton s	2	matched	4	MC	09:37:00	am	11		09:54:00	10:11:00	L	L	assortative	cmy	cmy	cmy	1	NA	NA	NA	00:17:00	00:17:00	17	17
2014-05-07	Canton s	2	matched	4	MC	09:37:00	am	13		10:03:00	10:30:00	L	L	assortative	cmy	cmy	cmy	1	NA	NA	NA	00:26:00	00:27:00	26	27
2014-05-07	Canton s	2	matched	4	MC	09:37:00	am	14		10:04:00	10:21:00	L	L	assortative	cmy	cmy	cmy	1	NA	NA	NA	00:27:00	00:17:00	27	17
2014-05-07	Canton s	2	matched	4	MC	09:37:00	am	15		10:07:00	10:27:00	L	L	assortative	cmy	cmy	cmy	1	NA	NA	NA	00:30:00	00:20:00	30	20
2014-05-07	Canton s	2	matched	4	MC	09:37:00	am	16		10:07:00	10:27:00	L	L	assortative	cmy	cmy	cmy	1	NA	NA	NA	00:30:00	00:20:00	30	20
2014-05-07	Canton s	2	matched	4	MC	09:37:00	am	17		10:07:00	10:27:00	L	L	assortative	cmy	cmy	cmy	1	NA	NA	NA	00:30:00	00:20:00	30	20
2014-05-07	Canton s	2	matched	4	MC	09:37:00	am	18		10:18:00	10:44:00	L	L	assortative	cmy	cmy	cmy	1	NA	NA	NA	00:41:00	00:26:00	41	26
2014-05-07	Canton s	2	matched	4	MC	09:37:00	am	20		10:36:00	10:59:00	L	L	assortative	cmy	cmy	cmy	1	NA	NA	NA	00:59:00	00:23:00	59	23
2014-05-07	Canton s	2	matched	4	MC	09:37:00	am	1		09:44:00	NA	NA	L	disassortative	NA	cmy	NA	NA	NA	NA	NA	00:07:00	#VALUE!	7	#VALUE!
2014-05-07	Canton s	2	matched	3	MC	09:31:00	am	3		09:48:00	10:19:00	L	R	disassortative	cmy	starch	SxC	0	NA	NA	NA	00:17:00	00:31:00	17	31
2014-05-07	Canton s	2	matched	3	MC	09:31:00	am	4		09:49:00	10:09:00	L	R	disassortative	cmy	starch	SxC	0	NA	NA	NA	00:18:00	00:20:00	18	20
2014-05-07	Canton s	2	matched	3	MC	09:31:00	am	5		09:53:00	10:17:00	L	R	disassortative	cmy	starch	SxC	0	NA	NA	NA	00:22:00	00:24:00	22	24
2014-05-07	Canton s	2	matched	3	MC	09:31:00	am	8		10:03:00	10:22:00	L	R	disassortative	cmy	starch	SxC	0	NA	NA	NA	00:32:00	00:19:00	32	19
2014-05-07	Canton s	2	matched	3	MC	09:31:00	am	9		10:09:00	10:28:00	L	R	disassortative	cmy	starch	SxC	0	NA	NA	NA	00:38:00	00:19:00	38	19
2014-05-07	Canton s	2	matched	3	MC	09:31:00	am	12		10:16:00	10:38:00	L	R	disassortative	cmy	starch	SxC	0	NA	NA	NA	00:45:00	00:22:00	45	22
2014-05-07	Canton s	2	matched	3	MC	09:31:00	am	13		10:22:00	10:41:00	L	R	disassortative	cmy	starch	SxC	0	NA	NA	NA	00:51:00	00:19:00	51	19
2014-05-07	Canton s	2	matched	3	MC	09:31:00	am	16		10:28:00	10:46:00	L	R	disassortative	cmy	starch	SxC	0	NA	NA	NA	00:57:00	00:18:00	57	18
2014-05-07	Canton s	2	matched	4	MC	09:37:00	am	3		09:46:00	10:15:00	L	R	disassortative	cmy	starch	SxC	0	NA	NA	NA	00:09:00	00:29:00	9	29
2014-05-07	Canton s	2	matched	4	MC	09:37:00	am	9		09:52:00	10:27:00	L	R	disassortative	cmy	starch	SxC	0	NA	NA	NA	00:15:00	00:35:00	15	35
2014-05-07	Canton s	2	matched	4	MC	09:37:00	am	10		09:54:00	10:14:00	L	R	disassortative	cmy	starch	SxC	0	NA	NA	NA	00:17:00	00:20:00	17	20
2014-05-07	Canton s	2	matched	4	MC	09:37:00	am	12		09:58:00	10:14:00	L	R	disassortative	cmy	starch	SxC	0	NA	NA	NA	00:21:00	00:16:00	21	16
2014-05-07	Canton s	2	matched	4	MC	09:37:00	am	19		10:20:00	10:37:00	L	R	disassortative	cmy	starch	SxC	0	NA	NA	NA	00:43:00	00:17:00	43	17
2014-05-07	Canton s	2	matched	4	MC	09:37:00	am	21		10:36:00	10:56:00	L	R	disassortative	cmy	starch	SxC	0	NA	NA	NA	00:59:00	00:20:00	59	20
2014-05-15	Canton s	2	matched	3	MC	09:17:00	am	8		09:59:00	10:14:00	R	R	assortative	cmy	cmy	cmy	1	NA	NA	NA	00:42:00	00:15:00	42	15
2014-05-15	Canton s	2	matched	3	MC	09:17:00	am	9		10:00:00	10:14:00	R	R	assortative	cmy	cmy	cmy	1	NA	NA	NA	00:43:00	00:14:00	43	14
2014-05-15	Canton s	2	matched	4	MC	09:08:00	am	2		09:21:00	09:38:00	R	R	assortative	cmy	cmy	cmy	1	NA	NA	NA	00:13:00	00:17:00	13	17
2014-05-15	Canton s	2	matched	4	MC	09:08:00	am	3		09:26:00	09:38:00	R	R	assortative	cmy	cmy	cmy	1	NA	NA	NA	00:18:00	00:12:00	18	12
2014-05-15	Canton s	2	matched	4	MC	09:08:00	am	6		09:27:00	09:44:00	R	R	assortative	cmy	cmy	cmy	1	NA	NA	NA	00:19:00	00:17:00	19	17
2014-05-15	Canton s	2	matched	4	MC	09:08:00	am	8		09:39:00	09:58:00	R	R	assortative	cmy	cmy	cmy	1	NA	NA	NA	00:31:00	00:19:00	31	19
2014-05-15	Canton s	2	matched	4	MC	09:08:00	am	10		09:55:00	10:03:00	R	R	assortative	cmy	cmy	cmy	1	NA	NA	NA	00:47:00	00:08:00	47	8
2014-05-15	Canton s	2	matched	3	MC	09:17:00	am	1		09:30:00	09:47:00	R	L	disassortative	cmy	starch	SxC	0	NA	NA	NA	00:13:00	00:17:00	13	17
2014-05-15	Canton s	2	matched	3	MC	09:17:00	am	2		09:33:00	09:45:00	R	L	disassortative	cmy	starch	SxC	0	NA	NA	NA	00:16:00	00:12:00	16	12
2014-05-15	Canton s	2	matched	3	MC	09:17:00	am	3		09:36:00	09:51:00	R	L	disassortative	cmy	starch	SxC	0	NA	NA	NA	00:19:00	00:15:00	19	15
2014-05-15	Canton s	2	matched	3	MC	09:17:00	am	4		09:39:00	09:59:00	R	L	disassortative	cmy	starch	SxC	0	NA	NA	NA	00:22:00	00:20:00	22	20
2014-05-15	Canton s	2	matched	3	MC	09:17:00	am	5		09:39:00	09:59:00	R	L	disassortative	cmy	starch	SxC	0	NA	NA	NA	00:22:00	00:20:00	22	20
2014-05-15	Canton s	2	matched	3	MC	09:17:00	am	6		09:42:00	09:56:00	R	L	disassortative	cmy	starch	SxC	0	NA	NA	NA	00:25:00	00:14:00	25	14
2014-05-15	Canton s	2	matched	3	MC	09:17:00	am	7		09:54:00	10:08:00	R	L	disassortative	cmy	starch	SxC	0	NA	NA	NA	00:37:00	00:14:00	37	14
2014-05-15	Canton s	2	matched	3	MC	09:17:00	am	10		10:08:00	10:27:00	R	L	disassortative	cmy	starch	SxC	0	NA	NA	NA	00:51:00	00:19:00	51	19
2014-05-15	Canton s	2	matched	4	MC	09:08:00	am	1		09:20:00	09:42:00	R	L	disassortative	cmy	starch	SxC	0	NA	NA	NA	00:12:00	00:22:00	12	22
2014-05-15	Canton s	2	matched	4	MC	09:08:00	am	4		09:26:00	09:43:00	R	L	disassortative	cmy	starch	SxC	0	NA	NA	NA	00:18:00	00:17:00	18	17
2014-05-15	Canton s	2	matched	4	MC	09:08:00	am	5		09:27:00	09:38:00	R	L	disassortative	cmy	starch	SxC	0	NA	NA	NA	00:19:00	00:11:00	19	11
2014-05-15	Canton s	2	matched	4	MC	09:08:00	am	7		09:31:00	09:43:00	R	L	disassortative	cmy	starch	SxC	0	NA	NA	NA	00:23:00	00:12:00	23	12
2014-05-15	Canton s	2	matched	4	MC	09:08:00	am	9		09:49:00	10:07:00	R	L	disassortative	cmy	starch	SxC	0	NA	NA	NA	00:41:00	00:18:00	41	18
2014-05-22	Canton s	1	matched	2	MC	09:34:00	am	1		09:44:00	10:06:00	L	L	assortative	cmy	cmy	cmy	1	NA	NA	NA	00:10:00	00:22:00	10	22
2014-05-22	Canton s	1	matched	2	MC	09:34:00	am	2		09:45:00	10:01:00	L	L	assortative	cmy	cmy	cmy	1	NA	NA	NA	00:11:00	00:16:00	11	16
2014-05-22	Canton s	1	matched	2	MC	09:34:00	am	4		09:49:00	10:08:00	L	L	assortative	cmy	cmy	cmy	1	NA	NA	NA	00:15:00	00:19:00	15	19
2014-05-22	Canton s	1	matched	2	MC	09:34:00	am	6		09:51:00	10:12:00	L	L	assortative	cmy	cmy	cmy	1	NA	NA	NA	00:17:00	00:21:00	17	21
2014-05-22	Canton s	1	matched	2	MC	09:34:00	am	8		09:52:00	10:15:00	L	L	assortative	cmy	cmy	cmy	1	NA	NA	NA	00:18:00	00:23:00	18	23
2014-05-22	Canton s	1	matched	2	MC	09:34:00	am	10		09:53:00	10:13:00	L	L	assortative	cmy	cmy	cmy	1	NA	NA	NA	00:19:00	00:20:00	19	20
2014-05-22	Canton s	1	matched	2	MC	09:34:00	am	11		09:54:00	10:22:00	L	L	assortative	cmy	cmy	cmy	1	NA	NA	NA	00:20:00	00:28:00	20	28
2014-05-22	Canton s	1	matched	2	MC	09:34:00	am	12		09:58:00	10:20:00	L	L	assortative	cmy	cmy	cmy	1	NA	NA	NA	00:24:00	00:22:00	24	22
2014-05-22	Canton s	1	matched	2	MC	09:34:00	am	3		09:48:00	10:08:00	L	R	disassortative	cmy	starch	SxC	0	NA	NA	NA	00:14:00	00:20:00	14	20
2014-05-22	Canton s	1	matched	2	MC	09:34:00	am	5		09:50:00	10:08:00	L	R	disassortative	cmy	starch	SxC	0	NA	NA	NA	00:16:00	00:18:00	16	18
2014-05-22	Canton s	1	matched	2	MC	09:34:00	am	7		09:51:00	10:14:00	L	R	disassortative	cmy	starch	SxC	0	NA	NA	NA	00:17:00	00:23:00	17	23
2014-05-22	Canton s	1	matched	2	MC	09:34:00	am	9		09:52:00	10:16:00	L	R	disassortative	cmy	starch	SxC	0	NA	NA	NA	00:18:00	00:24:00	18	24
2014-05-22	Canton s	1	matched	2	MC	09:34:00	am	13		10:01:00	10:19:00	L	R	disassortative	cmy	starch	SxC	0	NA	NA	NA	00:27:00	00:18:00	27	18
2014-05-22	Canton s	1	matched	2	MC	09:34:00	am	14		10:03:00	10:22:00	L	R	disassortative	cmy	starch	SxC	0	NA	NA	NA	00:29:00	00:19:00	29	19
2014-05-22	Canton s	1	matched	2	MC	09:34:00	am	15		10:04:00	10:30:00	L	R	disassortative	cmy	starch	SxC	0	NA	NA	NA	00:30:00	00:26:00	30	26
2014-05-28	Canton s	2	matched	2	MC	09:40:00	am	1		09:44:00	10:15:00	R	R	assortative	cmy	cmy	cmy	1	NA	NA	NA	00:04:00	00:31:00	4	31
2014-05-28	Canton s	2	matched	2	MC	09:40:00	am	3		09:46:00	10:09:00	R	R	assortative	cmy	cmy	cmy	1	NA	NA	NA	00:06:00	00:23:00	6	23
2014-05-28	Canton s	2	matched	2	MC	09:40:00	am	5		09:49:00	10:07:00	R	R	assortative	cmy	cmy	cmy	1	NA	NA	NA	00:09:00	00:18:00	9	18
2014-05-28	Canton s	2	matched	2	MC	09:40:00	am	6		09:51:00	10:13:00	R	R	assortative	cmy	cmy	cmy	1	NA	NA	NA	00:11:00	00:22:00	11	22
2014-05-28	Canton s	2	matched	2	MC	09:40:00	am	7		09:53:00	10:15:00	R	R	assortative	cmy	cmy	cmy	1	NA	NA	NA	00:13:00	00:22:00	13	22
2014-05-28	Canton s	2	matched	2	MC	09:40:00	am	8		09:54:00	10:22:00	R	R	assortative	cmy	cmy	cmy	1	NA	NA	NA	00:14:00	00:28:00	14	28
2014-05-28	Canton s	2	matched	2	MC	09:40:00	am	9		09:59:00	10:21:00	R	R	assortative	cmy	cmy	cmy	1	NA	NA	NA	00:19:00	00:22:00	19	22
2014-05-28	Canton s	2	matched	2	MC	09:40:00	am	13		10:00:00	10:19:00	R	R	assortative	cmy	cmy	cmy	1	NA	NA	NA	00:20:00	00:19:00	20	19
2014-05-28	Canton s	2	matched	2	MC	09:40:00	am	14		10:01:00	10:20:00	R	R	assortative	cmy	cmy	cmy	1	NA	NA	NA	00:21:00	00:19:00	21	19
2014-05-28	Canton s	2	matched	2	MC	09:40:00	am	16		10:02:00	10:22:00	R	R	assortative	cmy	cmy	cmy	1	NA	NA	NA	00:22:00	00:20:00	22	20
2014-05-28	Canton s	2	matched	2	MC	09:40:00	am	17		10:03:00	10:22:00	R	R	assortative	cmy	cmy	cmy	1	NA	NA	NA	00:23:00	00:19:00	23	19
2014-05-28	Canton s	2	matched	2	MC	09:40:00	am	18		10:03:00	10:25:00	R	R	assortative	cmy	cmy	cmy	1	NA	NA	NA	00:23:00	00:22:00	23	22
2014-05-28	Canton s	2	matched	2	MC	09:40:00	am	20		10:23:00	10:39:00	R	R	assortative	cmy	cmy	cmy	1	NA	NA	NA	00:43:00	00:16:00	43	16
2014-05-28	Canton s	2	matched	2	MC	09:40:00	am	2		09:45:00	10:17:00	R	L	disassortative	cmy	starch	SxC	0	NA	NA	NA	00:05:00	00:32:00	5	32
2014-05-28	Canton s	2	matched	2	MC	09:40:00	am	4		09:46:00	10:07:00	R	L	disassortative	cmy	starch	SxC	0	NA	NA	NA	00:06:00	00:21:00	6	21
2014-05-28	Canton s	2	matched	2	MC	09:40:00	am	10		09:59:00	10:15:00	R	L	disassortative	cmy	starch	SxC	0	NA	NA	NA	00:19:00	00:16:00	19	16
2014-05-28	Canton s	2	matched	2	MC	09:40:00	am	11		10:00:00	10:22:00	R	L	disassortative	cmy	starch	SxC	0	NA	NA	NA	00:20:00	00:22:00	20	22
2014-05-28	Canton s	2	matched	2	MC	09:40:00	am	12		10:00:00	10:19:00	R	L	disassortative	cmy	starch	SxC	0	NA	NA	NA	00:20:00	00:19:00	20	19
2014-05-28	Canton s	2	matched	2	MC	09:40:00	am	15		10:01:00	10:21:00	R	L	disassortative	cmy	starch	SxC	0	NA	NA	NA	00:21:00	00:20:00	21	20
2014-05-28	Canton s	2	matched	2	MC	09:40:00	am	19		10:16:00	10:38:00	R	L	disassortative	cmy	starch	SxC	0	NA	NA	NA	00:36:00	00:22:00	36	22
2014-05-28	Canton s	2	matched	2	MC	09:40:00	am	21		10:29:00	10:53:00	R	L	disassortative	cmy	starch	SxC	0	NA	NA	NA	00:49:00	00:24:00	49	24
2014-05-28	Canton s	2	matched	2	MC	09:40:00	am	22		10:30:00	10:56:00	R	L	disassortative	cmy	starch	SxC	0	NA	NA	NA	00:50:00	00:26:00	50	26
2014-05-28	Canton s	2	matched	2	MC	09:40:00	am	23		10:36:00	11:00:00	R	L	disassortative	cmy	starch	SxC	0	NA	NA	NA	00:56:00	00:24:00	56	24
2014-06-05	Canton s	1	matched	2	MC	09:20:00	am	4		09:51:00	10:13:00	L	L	assortative	cmy	cmy	cmy	1	NA	NA	NA	00:31:00	00:22:00	31	22
2014-06-05	Canton s	1	matched	2	MC	09:20:00	am	5		09:52:00	10:13:00	L	L	assortative	cmy	cmy	cmy	1	NA	NA	NA	00:32:00	00:21:00	32	21
2014-06-05	Canton s	1	matched	2	MC	09:20:00	am	7		09:58:00	10:19:00	L	L	assortative	cmy	cmy	cmy	1	NA	NA	NA	00:38:00	00:21:00	38	21
2014-06-05	Canton s	1	matched	2	MC	09:20:00	am	8		10:04:00	10:28:00	L	L	assortative	cmy	cmy	cmy	1	NA	NA	NA	00:44:00	00:24:00	44	24
2014-06-05	Canton s	1	matched	2	MC	09:20:00	am	10		10:16:00	10:35:00	L	L	assortative	cmy	cmy	cmy	1	NA	NA	NA	00:56:00	00:19:00	56	19
2014-06-05	Canton s	1	matched	2	MC	09:20:00	am	1		09:45:00	10:00:00	L	R	disassortative	cmy	starch	SxC	0	NA	NA	NA	00:25:00	00:15:00	25	15
2014-06-05	Canton s	1	matched	2	MC	09:20:00	am	2		09:46:00	10:08:00	L	R	disassortative	cmy	starch	SxC	0	NA	NA	NA	00:26:00	00:22:00	26	22
2014-06-05	Canton s	1	matched	2	MC	09:20:00	am	3		09:49:00	10:09:00	L	R	disassortative	cmy	starch	SxC	0	NA	NA	NA	00:29:00	00:20:00	29	20
2014-06-05	Canton s	1	matched	2	MC	09:20:00	am	6		09:57:00	10:19:00	L	R	disassortative	cmy	starch	SxC	0	NA	NA	NA	00:37:00	00:22:00	37	22
2014-06-05	Canton s	1	matched	2	MC	09:20:00	am	9		10:15:00	10:34:00	L	R	disassortative	cmy	starch	SxC	0	NA	NA	NA	00:55:00	00:19:00	55	19
2014-04-17	Canton s	1	matched	5	MS	09:54:00	am	1	NA	09:59:00	10:12:00	L	L	assortative	starch	starch	starch	1	NA	NA	NA	00:05:00	00:13:00	5	13
2014-04-17	Canton s	1	matched	5	MS	09:54:00	am	6	NA	10:10:00	10:32:00	L	L	assortative	starch	starch	starch	1	NA	NA	NA	00:16:00	00:22:00	16	22
2014-04-17	Canton s	1	matched	5	MS	09:54:00	am	9	NA	10:15:00	10:37:00	L	L	assortative	starch	starch	starch	1	NA	NA	NA	00:21:00	00:22:00	21	22
2014-04-17	Canton s	1	matched	5	MS	09:54:00	am	10	NA	10:17:00	10:35:00	L	L	assortative	starch	starch	starch	1	NA	NA	NA	00:23:00	00:18:00	23	18
2014-04-17	Canton s	1	matched	5	MS	09:54:00	am	11	NA	10:19:00	10:27:00	L	L	assortative	starch	starch	starch	1	NA	NA	NA	00:25:00	00:08:00	25	8
2014-04-17	Canton s	1	matched	6	MS	10:02:00	am	4	NA	10:14:00	10:33:00	L	L	assortative	starch	starch	starch	1	NA	NA	NA	00:12:00	00:19:00	12	19
2014-04-17	Canton s	1	matched	6	MS	10:02:00	am	7	NA	10:22:00	10:40:00	L	L	assortative	starch	starch	starch	1	NA	NA	NA	00:20:00	00:18:00	20	18
2014-04-17	Canton s	1	matched	6	MS	10:02:00	am	11	NA	10:29:00	10:47:00	L	L	assortative	starch	starch	starch	1	NA	NA	NA	00:27:00	00:18:00	27	18
2014-04-17	Canton s	1	matched	6	MS	10:02:00	am	13	NA	10:43:00	11:04:00	L	L	assortative	starch	starch	starch	1	NA	NA	NA	00:41:00	00:21:00	41	21
2014-04-17	Canton s	1	matched	6	MS	10:02:00	am	16	NA	10:59:00	11:18:00	L	L	assortative	starch	starch	starch	1	NA	NA	NA	00:57:00	00:19:00	57	19
2014-04-17	Canton s	1	matched	5	MS	09:54:00	am	2	NA	10:02:00	10:20:00	L	R	disassortative	starch	cmy	CxS	0	NA	NA	NA	00:08:00	00:18:00	8	18
2014-04-17	Canton s	1	matched	5	MS	09:54:00	am	3	NA	10:08:00	10:27:00	L	R	disassortative	starch	cmy	CxS	0	NA	NA	NA	00:14:00	00:19:00	14	19
2014-04-17	Canton s	1	matched	5	MS	09:54:00	am	4	NA	10:08:00	10:30:00	L	R	disassortative	starch	cmy	CxS	0	NA	NA	NA	00:14:00	00:22:00	14	22
2014-04-17	Canton s	1	matched	5	MS	09:54:00	am	5	NA	10:09:00	10:30:00	L	R	disassortative	starch	cmy	CxS	0	NA	NA	NA	00:15:00	00:21:00	15	21
2014-04-17	Canton s	1	matched	5	MS	09:54:00	am	7	NA	10:14:00	10:32:00	L	R	disassortative	starch	cmy	CxS	0	NA	NA	NA	00:20:00	00:18:00	20	18
2014-04-17	Canton s	1	matched	5	MS	09:54:00	am	8	NA	10:14:00	10:35:00	L	R	disassortative	starch	cmy	CxS	0	NA	NA	NA	00:20:00	00:21:00	20	21
2014-04-17	Canton s	1	matched	5	MS	09:54:00	am	12	NA	10:25:00	10:48:00	L	R	disassortative	starch	cmy	CxS	0	NA	NA	NA	00:31:00	00:23:00	31	23
2014-04-17	Canton s	1	matched	5	MS	09:54:00	am	13	NA	10:45:00	11:13:00	L	R	disassortative	starch	cmy	CxS	0	NA	NA	NA	00:51:00	00:28:00	51	28
2014-04-17	Canton s	1	matched	5	MS	09:54:00	am	14	NA	10:54:00	11:14:00	L	R	disassortative	starch	cmy	CxS	0	NA	NA	NA	01:00:00	00:20:00	0	20
2014-04-17	Canton s	1	matched	6	MS	10:02:00	am	1	NA	10:10:00	10:26:00	L	R	disassortative	starch	cmy	CxS	0	NA	NA	NA	00:08:00	00:16:00	8	16
2014-04-17	Canton s	1	matched	6	MS	10:02:00	am	2	NA	10:10:00	10:30:00	L	R	disassortative	starch	cmy	CxS	0	NA	NA	NA	00:08:00	00:20:00	8	20
2014-04-17	Canton s	1	matched	6	MS	10:02:00	am	3	NA	10:12:00	10:33:00	L	R	disassortative	starch	cmy	CxS	0	NA	NA	NA	00:10:00	00:21:00	10	21
2014-04-17	Canton s	1	matched	6	MS	10:02:00	am	5	NA	10:14:00	10:36:00	L	R	disassortative	starch	cmy	CxS	0	NA	NA	NA	00:12:00	00:22:00	12	22
2014-04-17	Canton s	1	matched	6	MS	10:02:00	am	6	NA	10:19:00	10:37:00	L	R	disassortative	starch	cmy	CxS	0	NA	NA	NA	00:17:00	00:18:00	17	18
2014-04-17	Canton s	1	matched	6	MS	10:02:00	am	8	NA	10:25:00	10:50:00	L	R	disassortative	starch	cmy	CxS	0	NA	NA	NA	00:23:00	00:25:00	23	25
2014-04-17	Canton s	1	matched	6	MS	10:02:00	am	9	NA	10:26:00	10:44:00	L	R	disassortative	starch	cmy	CxS	0	NA	NA	NA	00:24:00	00:18:00	24	18
2014-04-17	Canton s	1	matched	6	MS	10:02:00	am	10	NA	10:28:00	10:48:00	L	R	disassortative	starch	cmy	CxS	0	NA	NA	NA	00:26:00	00:20:00	26	20
2014-04-17	Canton s	1	matched	6	MS	10:02:00	am	12	NA	10:40:00	10:58:00	L	R	disassortative	starch	cmy	CxS	0	NA	NA	NA	00:38:00	00:18:00	38	18
2014-04-17	Canton s	1	matched	6	MS	10:02:00	am	14	NA	10:51:00	11:08:00	L	R	disassortative	starch	cmy	CxS	0	NA	NA	NA	00:49:00	00:17:00	49	17
2014-04-17	Canton s	1	matched	6	MS	10:02:00	am	15	NA	10:55:00	11:13:00	L	R	disassortative	starch	cmy	CxS	0	NA	NA	NA	00:53:00	00:18:00	53	18
2014-04-17	Canton s	1	matched	6	MS	10:02:00	am	17	NA	11:00:00	11:28:00	L	R	disassortative	starch	cmy	CxS	0	NA	NA	NA	00:58:00	00:28:00	58	28
2014-04-17	Canton s	1	matched	6	MS	10:02:00	am	18	NA	11:02:00	11:31:00	L	R	disassortative	starch	cmy	CxS	0	NA	NA	NA	01:00:00	00:29:00	0	29
2014-04-24	Canton s	2	matched	1	MS	09:46:00	am	3	A5	10:02:00	10:16:00	R	R	assortative	starch	starch	starch	1	NA	NA	NA	00:16:00	00:14:00	16	14
2014-04-24	Canton s	2	matched	1	MS	09:46:00	am	7	D1	10:05:00	10:23:00	R	R	assortative	starch	starch	starch	1	NA	NA	NA	00:19:00	00:18:00	19	18
2014-04-24	Canton s	2	matched	1	MS	09:46:00	am	8	B6	10:05:00	10:23:00	R	R	assortative	starch	starch	starch	1	NA	NA	NA	00:19:00	00:18:00	19	18
2014-04-24	Canton s	2	matched	1	MS	09:46:00	am	9	B1	10:10:00	10:29:00	R	R	assortative	starch	starch	starch	1	NA	NA	NA	00:24:00	00:19:00	24	19
2014-04-24	Canton s	2	matched	1	MS	09:46:00	am	11	C5	10:16:00	10:34:00	R	R	assortative	starch	starch	starch	1	NA	NA	NA	00:30:00	00:18:00	30	18
2014-04-24	Canton s	2	matched	1	MS	09:46:00	am	12	A6	10:10:00	10:41:00	R	R	assortative	starch	starch	starch	1	NA	NA	NA	00:24:00	00:31:00	24	31
2014-04-24	Canton s	2	matched	1	MS	09:46:00	am	14	D4	10:25:00	10:42:00	R	R	assortative	starch	starch	starch	1	NA	NA	NA	00:39:00	00:17:00	39	17
2014-04-24	Canton s	2	matched	1	MS	09:46:00	am	15	A3	10:28:00	10:43:00	R	R	assortative	starch	starch	starch	1	NA	NA	NA	00:42:00	00:15:00	42	15
2014-04-24	Canton s	2	matched	1	MS	09:46:00	am	16	A4	10:36:00	10:55:00	R	R	assortative	starch	starch	starch	1	NA	NA	NA	00:50:00	00:19:00	50	19
2014-04-24	Canton s	2	matched	1	MS	09:46:00	am	17	B2	10:38:00	11:02:00	R	R	assortative	starch	starch	starch	1	NA	NA	NA	00:52:00	00:24:00	52	24
2014-04-24	Canton s	2	matched	2	MS	09:47:00	am	1	A4	10:09:00	10:32:00	R	R	assortative	starch	starch	starch	1	NA	NA	NA	00:22:00	00:23:00	22	23
2014-04-24	Canton s	2	matched	2	MS	09:47:00	am	2	B6	10:13:00	10:34:00	R	R	assortative	starch	starch	starch	1	NA	NA	NA	00:26:00	00:21:00	26	21
2014-04-24	Canton s	2	matched	2	MS	09:47:00	am	5	A1	10:24:00	10:52:00	R	R	assortative	starch	starch	starch	1	NA	NA	NA	00:37:00	00:28:00	37	28
2014-04-24	Canton s	2	matched	2	MS	09:47:00	am	6	B5	10:29:00	10:44:00	R	R	assortative	starch	starch	starch	1	NA	NA	NA	00:42:00	00:15:00	42	15
2014-04-24	Canton s	2	matched	2	MS	09:47:00	am	7	B2	10:30:00	10:46:00	R	R	assortative	starch	starch	starch	1	NA	NA	NA	00:43:00	00:16:00	43	16
2014-04-24	Canton s	2	matched	1	MS	09:46:00	am	1	B3	09:56:00	10:16:00	R	L	disassortative	starch	cmy	CxS	0	NA	NA	NA	00:10:00	00:20:00	10	20
2014-04-24	Canton s	2	matched	1	MS	09:46:00	am	2	C1	09:58:00	10:12:00	R	L	disassortative	starch	cmy	CxS	0	NA	NA	NA	00:12:00	00:14:00	12	14
2014-04-24	Canton s	2	matched	1	MS	09:46:00	am	4	D6	10:02:00	10:28:00	R	L	disassortative	starch	cmy	CxS	0	NA	NA	NA	00:16:00	00:26:00	16	26
2014-04-24	Canton s	2	matched	1	MS	09:46:00	am	5	A2	10:04:00	10:29:00	R	L	disassortative	starch	cmy	CxS	0	NA	NA	NA	00:18:00	00:25:00	18	25
2014-04-24	Canton s	2	matched	1	MS	09:46:00	am	6	B4	10:05:00	10:21:00	R	L	disassortative	starch	cmy	CxS	0	NA	NA	NA	00:19:00	00:16:00	19	16
2014-04-24	Canton s	2	matched	1	MS	09:46:00	am	10	C6	10:14:00	10:34:00	R	L	disassortative	starch	cmy	CxS	0	NA	NA	NA	00:28:00	00:20:00	28	20
2014-04-24	Canton s	2	matched	1	MS	09:46:00	am	13	C2	10:24:00	10:43:00	R	L	disassortative	starch	cmy	CxS	0	NA	NA	NA	00:38:00	00:19:00	38	19
2014-04-24	Canton s	2	matched	2	MS	09:47:00	am	3	A4	10:17:00	10:33:00	R	L	disassortative	starch	cmy	CxS	0	NA	NA	NA	00:30:00	00:16:00	30	16
2014-04-24	Canton s	2	matched	2	MS	09:47:00	am	4	B4	10:21:00	10:35:00	R	L	disassortative	starch	cmy	CxS	0	NA	NA	NA	00:34:00	00:14:00	34	14
2014-04-24	Canton s	2	matched	2	MS	09:47:00	am	8	A3	10:33:00	10:52:00	R	L	disassortative	starch	cmy	CxS	0	NA	NA	NA	00:46:00	00:19:00	46	19
2014-05-01	Canton s	1	matched	5	MS	09:36:00	am	3		09:45:00	10:10:00	L	L	assortative	starch	starch	starch	1	NA	NA	NA	00:09:00	00:25:00	9	25
2014-05-01	Canton s	1	matched	5	MS	09:36:00	am	4		09:47:00	10:08:00	L	L	assortative	starch	starch	starch	1	NA	NA	NA	00:11:00	00:21:00	11	21
2014-05-01	Canton s	1	matched	5	MS	09:36:00	am	6		09:51:00	10:08:00	L	L	assortative	starch	starch	starch	1	NA	NA	NA	00:15:00	00:17:00	15	17
2014-05-01	Canton s	1	matched	5	MS	09:36:00	am	7		09:53:00	10:14:00	L	L	assortative	starch	starch	starch	1	NA	NA	NA	00:17:00	00:21:00	17	21
2014-05-01	Canton s	1	matched	5	MS	09:36:00	am	8		09:54:00	10:19:00	L	L	assortative	starch	starch	starch	1	NA	NA	NA	00:18:00	00:25:00	18	25
2014-05-01	Canton s	1	matched	5	MS	09:36:00	am	9		09:57:00	10:22:00	L	L	assortative	starch	starch	starch	1	NA	NA	NA	00:21:00	00:25:00	21	25
2014-05-01	Canton s	1	matched	5	MS	09:36:00	am	14		10:14:00	10:28:00	L	L	assortative	starch	starch	starch	1	NA	NA	NA	00:38:00	00:14:00	38	14
2014-05-01	Canton s	1	matched	5	MS	09:36:00	am	1		09:45:00	10:10:00	L	R	disassortative	starch	cmy	CxS	0	NA	NA	NA	00:09:00	00:25:00	9	25
2014-05-01	Canton s	1	matched	5	MS	09:36:00	am	2		09:45:00	10:01:00	L	R	disassortative	starch	cmy	CxS	0	NA	NA	NA	00:09:00	00:16:00	9	16
2014-05-01	Canton s	1	matched	5	MS	09:36:00	am	5		09:50:00	10:10:00	L	R	disassortative	starch	cmy	CxS	0	NA	NA	NA	00:14:00	00:20:00	14	20
2014-05-01	Canton s	1	matched	5	MS	09:36:00	am	10		10:03:00	10:20:00	L	R	disassortative	starch	cmy	CxS	0	NA	NA	NA	00:27:00	00:17:00	27	17
2014-05-01	Canton s	1	matched	5	MS	09:36:00	am	11		10:05:00	10:28:00	L	R	disassortative	starch	cmy	CxS	0	NA	NA	NA	00:29:00	00:23:00	29	23
2014-05-01	Canton s	1	matched	5	MS	09:36:00	am	12		10:08:00	10:29:00	L	R	disassortative	starch	cmy	CxS	0	NA	NA	NA	00:32:00	00:21:00	32	21
2014-05-01	Canton s	1	matched	5	MS	09:36:00	am	13		10:14:00	10:29:00	L	R	disassortative	starch	cmy	CxS	0	NA	NA	NA	00:38:00	00:15:00	38	15
2014-05-01	Canton s	1	matched	5	MS	09:36:00	am	15		10:24:00	10:42:00	L	R	disassortative	starch	cmy	CxS	0	NA	NA	NA	00:48:00	00:18:00	48	18
2014-05-07	Canton s	2	matched	5	MS	09:41:00	am	1		09:51:00	10:06:00	R	R	assortative	starch	starch	starch	1	NA	NA	NA	00:10:00	00:15:00	10	15
2014-05-07	Canton s	2	matched	5	MS	09:41:00	am	2		09:52:00	10:06:00	R	R	assortative	starch	starch	starch	1	NA	NA	NA	00:11:00	00:14:00	11	14
2014-05-07	Canton s	2	matched	5	MS	09:41:00	am	4		09:57:00	10:22:00	R	R	assortative	starch	starch	starch	1	NA	NA	NA	00:16:00	00:25:00	16	25
2014-05-07	Canton s	2	matched	5	MS	09:41:00	am	5		10:01:00	10:17:00	R	R	assortative	starch	starch	starch	1	NA	NA	NA	00:20:00	00:16:00	20	16
2014-05-07	Canton s	2	matched	5	MS	09:41:00	am	6		10:05:00	10:23:00	R	R	assortative	starch	starch	starch	1	NA	NA	NA	00:24:00	00:18:00	24	18
2014-05-07	Canton s	2	matched	5	MS	09:41:00	am	7		10:05:00	10:18:00	R	R	assortative	starch	starch	starch	1	NA	NA	NA	00:24:00	00:13:00	24	13
2014-05-07	Canton s	2	matched	5	MS	09:41:00	am	8		10:12:00	10:23:00	R	R	assortative	starch	starch	starch	1	NA	NA	NA	00:31:00	00:11:00	31	11
2014-05-07	Canton s	2	matched	5	MS	09:41:00	am	9		10:17:00	10:40:00	R	R	assortative	starch	starch	starch	1	NA	NA	NA	00:36:00	00:23:00	36	23
2014-05-07	Canton s	2	matched	5	MS	09:41:00	am	10		10:38:00	10:51:00	R	R	assortative	starch	starch	starch	1	NA	NA	NA	00:57:00	00:13:00	57	13
2014-05-07	Canton s	2	matched	6	MS	09:34:00	am	1		09:44:00	10:06:00	R	R	assortative	starch	starch	starch	1	NA	NA	NA	00:10:00	00:22:00	10	22
2014-05-07	Canton s	2	matched	6	MS	09:34:00	am	4		09:49:00	10:07:00	R	R	assortative	starch	starch	starch	1	NA	NA	NA	00:15:00	00:18:00	15	18
2014-05-07	Canton s	2	matched	6	MS	09:34:00	am	5		09:51:00	10:12:00	R	R	assortative	starch	starch	starch	1	NA	NA	NA	00:17:00	00:21:00	17	21
2014-05-07	Canton s	2	matched	6	MS	09:34:00	am	6		09:54:00	10:13:00	R	R	assortative	starch	starch	starch	1	NA	NA	NA	00:20:00	00:19:00	20	19
2014-05-07	Canton s	2	matched	6	MS	09:34:00	am	10		09:59:00	10:23:00	R	R	assortative	starch	starch	starch	1	NA	NA	NA	00:25:00	00:24:00	25	24
2014-05-07	Canton s	2	matched	6	MS	09:34:00	am	11		10:04:00	10:26:00	R	R	assortative	starch	starch	starch	1	NA	NA	NA	00:30:00	00:22:00	30	22
2014-05-07	Canton s	2	matched	5	MS	09:41:00	am	3		09:56:00	10:21:00	R	L	disassortative	starch	cmy	CxS	0	NA	NA	NA	00:15:00	00:25:00	15	25
2014-05-07	Canton s	2	matched	5	MS	09:41:00	am	11		10:39:00	10:58:00	R	L	disassortative	starch	cmy	CxS	0	NA	NA	NA	00:58:00	00:19:00	58	19
2014-05-07	Canton s	2	matched	6	MS	09:34:00	am	2		09:46:00	10:21:00	R	L	disassortative	starch	cmy	CxS	0	NA	NA	NA	00:12:00	00:35:00	12	35
2014-05-07	Canton s	2	matched	6	MS	09:34:00	am	3		09:47:00	10:06:00	R	L	disassortative	starch	cmy	CxS	0	NA	NA	NA	00:13:00	00:19:00	13	19
2014-05-07	Canton s	2	matched	6	MS	09:34:00	am	7		09:54:00	10:10:00	R	L	disassortative	starch	cmy	CxS	0	NA	NA	NA	00:20:00	00:16:00	20	16
2014-05-07	Canton s	2	matched	6	MS	09:34:00	am	8		09:54:00	10:11:00	R	L	disassortative	starch	cmy	CxS	0	NA	NA	NA	00:20:00	00:17:00	20	17
2014-05-07	Canton s	2	matched	6	MS	09:34:00	am	9		09:54:00	10:14:00	R	L	disassortative	starch	cmy	CxS	0	NA	NA	NA	00:20:00	00:20:00	20	20
2014-05-07	Canton s	2	matched	6	MS	09:34:00	am	12		10:10:00	10:28:00	R	L	disassortative	starch	cmy	CxS	0	NA	NA	NA	00:36:00	00:18:00	36	18
2014-05-07	Canton s	2	matched	6	MS	09:34:00	am	13		10:20:00	10:41:00	R	L	disassortative	starch	cmy	CxS	0	NA	NA	NA	00:46:00	00:21:00	46	21
2014-05-15	Canton s	2	matched	5	MS	09:22:00	am	1		09:30:00	09:48:00	L	L	assortative	starch	starch	starch	1	NA	NA	NA	00:08:00	00:18:00	8	18
2014-05-15	Canton s	2	matched	5	MS	09:22:00	am	5		09:37:00	10:05:00	L	L	assortative	starch	starch	starch	1	NA	NA	NA	00:15:00	00:28:00	15	28
2014-05-15	Canton s	2	matched	5	MS	09:22:00	am	6		09:42:00	10:04:00	L	L	assortative	starch	starch	starch	1	NA	NA	NA	00:20:00	00:22:00	20	22
2014-05-15	Canton s	2	matched	5	MS	09:22:00	am	7		09:42:00	10:25:00	L	L	assortative	starch	starch	starch	1	NA	NA	NA	00:20:00	00:43:00	20	43
2014-05-15	Canton s	2	matched	5	MS	09:22:00	am	8		09:52:00	10:10:00	L	L	assortative	starch	starch	starch	1	NA	NA	NA	00:30:00	00:18:00	30	18
2014-05-15	Canton s	2	matched	5	MS	09:22:00	am	9		09:54:00	09:56:00	L	L	assortative	starch	starch	starch	1	NA	NA	NA	00:32:00	00:02:00	32	2
2014-05-15	Canton s	2	matched	5	MS	09:22:00	am	12		10:03:00	10:30:00	L	L	assortative	starch	starch	starch	1	NA	NA	NA	00:41:00	00:27:00	41	27
2014-05-15	Canton s	2	matched	5	MS	09:22:00	am	14		10:14:00	10:35:00	L	L	assortative	starch	starch	starch	1	NA	NA	NA	00:52:00	00:21:00	52	21
2014-05-15	Canton s	2	matched	5	MS	09:22:00	am	15		10:21:00	10:44:00	L	L	assortative	starch	starch	starch	1	NA	NA	NA	00:59:00	00:23:00	59	23
2014-05-15	Canton s	2	matched	6	MS	09:28:00	am	1		09:31:00	09:59:00	L	L	assortative	starch	starch	starch	1	NA	NA	NA	00:03:00	00:28:00	3	28
2014-05-15	Canton s	2	matched	6	MS	09:28:00	am	2		09:38:00	09:56:00	L	L	assortative	starch	starch	starch	1	NA	NA	NA	00:10:00	00:18:00	10	18
2014-05-15	Canton s	2	matched	6	MS	09:28:00	am	3		09:38:00	09:57:00	L	L	assortative	starch	starch	starch	1	NA	NA	NA	00:10:00	00:19:00	10	19
2014-05-15	Canton s	2	matched	6	MS	09:28:00	am	4		09:39:00	10:00:00	L	L	assortative	starch	starch	starch	1	NA	NA	NA	00:11:00	00:21:00	11	21
2014-05-15	Canton s	2	matched	6	MS	09:28:00	am	10		09:47:00	10:12:00	L	L	assortative	starch	starch	starch	1	NA	NA	NA	00:19:00	00:25:00	19	25
2014-05-15	Canton s	2	matched	6	MS	09:28:00	am	12		09:53:00	10:09:00	L	L	assortative	starch	starch	starch	1	NA	NA	NA	00:25:00	00:16:00	25	16
2014-05-15	Canton s	2	matched	6	MS	09:28:00	am	13		09:55:00	10:19:00	L	L	assortative	starch	starch	starch	1	NA	NA	NA	00:27:00	00:24:00	27	24
2014-05-15	Canton s	2	matched	5	MS	09:22:00	am	2		09:34:00	09:56:00	L	R	disassortative	starch	cmy	CxS	0	NA	NA	NA	00:12:00	00:22:00	12	22
2014-05-15	Canton s	2	matched	5	MS	09:22:00	am	3		09:35:00	09:53:00	L	R	disassortative	starch	cmy	CxS	0	NA	NA	NA	00:13:00	00:18:00	13	18
2014-05-15	Canton s	2	matched	5	MS	09:22:00	am	4		09:35:00	09:54:00	L	R	disassortative	starch	cmy	CxS	0	NA	NA	NA	00:13:00	00:19:00	13	19
2014-05-15	Canton s	2	matched	5	MS	09:22:00	am	10		09:56:00	10:19:00	L	R	disassortative	starch	cmy	CxS	0	NA	NA	NA	00:34:00	00:23:00	34	23
2014-05-15	Canton s	2	matched	5	MS	09:22:00	am	11		09:56:00	10:12:00	L	R	disassortative	starch	cmy	CxS	0	NA	NA	NA	00:34:00	00:16:00	34	16
2014-05-15	Canton s	2	matched	5	MS	09:22:00	am	13		10:10:00	10:36:00	L	R	disassortative	starch	cmy	CxS	0	NA	NA	NA	00:48:00	00:26:00	48	26
2014-05-15	Canton s	2	matched	6	MS	09:28:00	am	5		09:40:00	09:55:00	L	R	disassortative	starch	cmy	CxS	0	NA	NA	NA	00:12:00	00:15:00	12	15
2014-05-15	Canton s	2	matched	6	MS	09:28:00	am	6		09:40:00	10:17:00	L	R	disassortative	starch	cmy	CxS	0	NA	NA	NA	00:12:00	00:37:00	12	37
2014-05-15	Canton s	2	matched	6	MS	09:28:00	am	7		09:40:00	10:00:00	L	R	disassortative	starch	cmy	CxS	0	NA	NA	NA	00:12:00	00:20:00	12	20
2014-05-15	Canton s	2	matched	6	MS	09:28:00	am	8		09:43:00	10:01:00	L	R	disassortative	starch	cmy	CxS	0	NA	NA	NA	00:15:00	00:18:00	15	18
2014-05-15	Canton s	2	matched	6	MS	09:28:00	am	9		09:44:00	10:01:00	L	R	disassortative	starch	cmy	CxS	0	NA	NA	NA	00:16:00	00:17:00	16	17
2014-05-15	Canton s	2	matched	6	MS	09:28:00	am	11		09:51:00	NA	L	R	disassortative	starch	cmy	CxS	0	NA	NA	NA	00:23:00	#VALUE!	23	#VALUE!
2014-05-15	Canton s	2	matched	6	MS	09:28:00	am	14		10:18:00	10:37:00	L	R	disassortative	starch	cmy	CxS	0	NA	NA	NA	00:50:00	00:19:00	50	19
2014-05-15	Canton s	2	matched	6	MS	09:28:00	am	15		10:22:00	10:44:00	L	R	disassortative	starch	cmy	CxS	0	NA	NA	NA	00:54:00	00:22:00	54	22
2014-05-22	Canton s	1	matched	3	MS	09:31:00	am	1		09:36:00	09:54:00	R	R	assortative	starch	starch	starch	1	NA	NA	NA	00:05:00	00:18:00	5	18
2014-05-22	Canton s	1	matched	3	MS	09:31:00	am	2		09:39:00	09:51:00	R	R	assortative	starch	starch	starch	1	NA	NA	NA	00:08:00	00:12:00	8	12
2014-05-22	Canton s	1	matched	3	MS	09:31:00	am	3		09:44:00	10:02:00	R	R	assortative	starch	starch	starch	1	NA	NA	NA	00:13:00	00:18:00	13	18
2014-05-22	Canton s	1	matched	3	MS	09:31:00	am	5		09:47:00	10:06:00	R	R	assortative	starch	starch	starch	1	NA	NA	NA	00:16:00	00:19:00	16	19
2014-05-22	Canton s	1	matched	3	MS	09:31:00	am	6		09:53:00	10:14:00	R	R	assortative	starch	starch	starch	1	NA	NA	NA	00:22:00	00:21:00	22	21
2014-05-22	Canton s	1	matched	3	MS	09:31:00	am	7		10:00:00	10:22:00	R	R	assortative	starch	starch	starch	1	NA	NA	NA	00:29:00	00:22:00	29	22
2014-05-22	Canton s	1	matched	3	MS	09:31:00	am	8		10:01:00	10:21:00	R	R	assortative	starch	starch	starch	1	NA	NA	NA	00:30:00	00:20:00	30	20
2014-05-22	Canton s	1	matched	3	MS	09:31:00	am	9		10:02:00	10:21:00	R	R	assortative	starch	starch	starch	1	NA	NA	NA	00:31:00	00:19:00	31	19
2014-05-22	Canton s	1	matched	3	MS	09:31:00	am	10		10:14:00	10:32:00	R	R	assortative	starch	starch	starch	1	NA	NA	NA	00:43:00	00:18:00	43	18
2014-05-22	Canton s	1	matched	3	MS	09:31:00	am	11		10:29:00	10:45:00	R	R	assortative	starch	starch	starch	1	NA	NA	NA	00:58:00	00:16:00	58	16
2014-05-22	Canton s	1	matched	3	MS	09:31:00	am	4		09:46:00	10:03:00	R	L	disassortative	starch	cmy	CxS	0	NA	NA	NA	00:15:00	00:17:00	15	17
2014-05-28	Canton s	2	matched	3	MS	11:00:00	am	3		11:11:00	11:28:00	L	L	assortative	starch	starch	starch	1	NA	NA	NA	00:11:00	00:17:00	11	17
2014-05-28	Canton s	2	matched	3	MS	11:00:00	am	5		11:13:00	11:34:00	L	L	assortative	starch	starch	starch	1	NA	NA	NA	00:13:00	00:21:00	13	21
2014-05-28	Canton s	2	matched	3	MS	11:00:00	am	7		11:17:00	11:40:00	L	L	assortative	starch	starch	starch	1	NA	NA	NA	00:17:00	00:23:00	17	23
2014-05-28	Canton s	2	matched	3	MS	11:00:00	am	8		11:17:00	11:35:00	L	L	assortative	starch	starch	starch	1	NA	NA	NA	00:17:00	00:18:00	17	18
2014-05-28	Canton s	2	matched	3	MS	11:00:00	am	9		11:17:00	11:34:00	L	L	assortative	starch	starch	starch	1	NA	NA	NA	00:17:00	00:17:00	17	17
2014-05-28	Canton s	2	matched	3	MS	11:00:00	am	12		11:27:00	11:42:00	L	L	assortative	starch	starch	starch	1	NA	NA	NA	00:27:00	00:15:00	27	15
2014-05-28	Canton s	2	matched	3	MS	11:00:00	am	14		11:31:00	11:51:00	L	L	assortative	starch	starch	starch	1	NA	NA	NA	00:31:00	00:20:00	31	20
2014-05-28	Canton s	2	matched	3	MS	11:00:00	am	18		11:52:00	12:05:00	L	L	assortative	starch	starch	starch	1	NA	NA	NA	00:52:00	00:13:00	52	13
2014-05-28	Canton s	2	matched	3	MS	11:00:00	am	1		11:09:00	11:28:00	L	R	disassortative	starch	cmy	CxS	0	NA	NA	NA	00:09:00	00:19:00	9	19
2014-05-28	Canton s	2	matched	3	MS	11:00:00	am	2		11:11:00	11:30:00	L	R	disassortative	starch	cmy	CxS	0	NA	NA	NA	00:11:00	00:19:00	11	19
2014-05-28	Canton s	2	matched	3	MS	11:00:00	am	4		11:13:00	11:34:00	L	R	disassortative	starch	cmy	CxS	0	NA	NA	NA	00:13:00	00:21:00	13	21
2014-05-28	Canton s	2	matched	3	MS	11:00:00	am	6		11:16:00	11:35:00	L	R	disassortative	starch	cmy	CxS	0	NA	NA	NA	00:16:00	00:19:00	16	19
2014-05-28	Canton s	2	matched	3	MS	11:00:00	am	10		11:19:00	11:42:00	L	R	disassortative	starch	cmy	CxS	0	NA	NA	NA	00:19:00	00:23:00	19	23
2014-05-28	Canton s	2	matched	3	MS	11:00:00	am	11		11:25:00	11:46:00	L	R	disassortative	starch	cmy	CxS	0	NA	NA	NA	00:25:00	00:21:00	25	21
2014-05-28	Canton s	2	matched	3	MS	11:00:00	am	13		11:30:00	11:51:00	L	R	disassortative	starch	cmy	CxS	0	NA	NA	NA	00:30:00	00:21:00	30	21
2014-05-28	Canton s	2	matched	3	MS	11:00:00	am	15		11:35:00	11:51:00	L	R	disassortative	starch	cmy	CxS	0	NA	NA	NA	00:35:00	00:16:00	35	16
2014-05-28	Canton s	2	matched	3	MS	11:00:00	am	16		11:39:00	11:57:00	L	R	disassortative	starch	cmy	CxS	0	NA	NA	NA	00:39:00	00:18:00	39	18
2014-05-28	Canton s	2	matched	3	MS	11:00:00	am	17		11:45:00	12:03:00	L	R	disassortative	starch	cmy	CxS	0	NA	NA	NA	00:45:00	00:18:00	45	18
2014-06-05	Canton s	1	matched	4	MS	09:20:00	am	3		09:35:00	09:56:00	R	R	assortative	starch	starch	starch	1	NA	NA	NA	00:15:00	00:21:00	15	21
2014-06-05	Canton s	1	matched	4	MS	09:20:00	am	5		09:41:00	09:59:00	R	R	assortative	starch	starch	starch	1	NA	NA	NA	00:21:00	00:18:00	21	18
2014-06-05	Canton s	1	matched	4	MS	09:20:00	am	6		09:42:00	09:59:00	R	R	assortative	starch	starch	starch	1	NA	NA	NA	00:22:00	00:17:00	22	17
2014-06-05	Canton s	1	matched	4	MS	09:20:00	am	7		09:44:00	09:59:00	R	R	assortative	starch	starch	starch	1	NA	NA	NA	00:24:00	00:15:00	24	15
2014-06-05	Canton s	1	matched	4	MS	09:20:00	am	8		09:44:00	10:02:00	R	R	assortative	starch	starch	starch	1	NA	NA	NA	00:24:00	00:18:00	24	18
2014-06-05	Canton s	1	matched	4	MS	09:20:00	am	10		09:54:00	10:14:00	R	R	assortative	starch	starch	starch	1	NA	NA	NA	00:34:00	00:20:00	34	20
2014-06-05	Canton s	1	matched	4	MS	09:20:00	am	12		10:18:00	10:38:00	R	R	assortative	starch	starch	starch	1	NA	NA	NA	00:58:00	00:20:00	58	20
2014-06-05	Canton s	1	matched	4	MS	09:20:00	am	1		09:31:00	09:46:00	R	L	disassortative	starch	cmy	CxS	0	NA	NA	NA	00:11:00	00:15:00	11	15
2014-06-05	Canton s	1	matched	4	MS	09:20:00	am	2		09:34:00	09:56:00	R	L	disassortative	starch	cmy	CxS	0	NA	NA	NA	00:14:00	00:22:00	14	22
2014-06-05	Canton s	1	matched	4	MS	09:20:00	am	4		09:36:00	09:59:00	R	L	disassortative	starch	cmy	CxS	0	NA	NA	NA	00:16:00	00:23:00	16	23
2014-06-05	Canton s	1	matched	4	MS	09:20:00	am	9		09:47:00	10:06:00	R	L	disassortative	starch	cmy	CxS	0	NA	NA	NA	00:27:00	00:19:00	27	19
2014-06-05	Canton s	1	matched	4	MS	09:20:00	am	11		09:55:00	10:14:00	R	L	disassortative	starch	cmy	CxS	0	NA	NA	NA	00:35:00	00:19:00	35	19
